17 **Abstract**

18

19 Different members of the same protein family often perform distinct cellular functions.  
20 How much are these differing functions due to changes in a protein's biochemical activity versus  
21 changes in other proteins? We asked how the budding yeast, *Saccharomyces cerevisiae*, evolves  
22 when forced to use the meiosis-specific kleisin, Rec8, instead of the mitotic kleisin, Scc1, during  
23 the mitotic cell cycle. This perturbation impairs sister chromosome linkage and reduces  
24 reproductive fitness by 45%. We evolved 15 populations for 1750 generations, substantially  
25 increasing their fitness, and analyzed their genotypes and phenotypes. We found no mutations in  
26 Rec8, but many populations had mutations in the transcriptional mediator complex, cohesin-  
27 related genes, and cell cycle regulators that induce S phase. These mutations improve sister  
28 chromosome cohesion and slow genome replication in Rec8-expressing cells. We conclude that  
29 changes in known and novel partners allow proteins to improve their ability to perform new  
30 functions.

31

32 **[146 words]**

33

34

## 35 Introduction

36

37 How does natural selection change a protein's function during evolution? The biological  
38 function of a protein is determined by its intrinsic biochemical activity and its interactions with  
39 other proteins that control its abundance, activity, and location within the cell. Paralogs, proteins  
40 which arise by gene duplication and perform different functions are good candidates for studying  
41 how evolution modifies protein function (Orengo and Thornton, 2005; Chothia et al., 2003).  
42 Paralogs can diverge in many ways. Changes in their promoters and enhancers lead to altered  
43 patterns of gene expression (Gagnon-Arsenault et al., 2013; Hittinger and Carroll, 2007) and  
44 changes in their amino acid sequences alter biochemical activity (Voordeckers et al., 2012),  
45 patterns of post-translational modification (Amoutzias et al., 2010; Nguyen Ba et al., 2014), or the  
46 identity of interacting partners (Aakre et al., 2015). It is much less easy to identify the changes in  
47 other genes that collaborate to increase the functional divergence between paralogs. One approach  
48 to this problem is to ask what must change, either in the candidate protein or elsewhere in the  
49 genome, to allow a protein to perform the function of a paralog from which it diverged hundreds  
50 of millions of years ago.

51

52 To study how protein function evolves, we studied the kleisin protein family whose  
53 members organize the structure of chromosomal DNA. In prokaryotes and eukaryotes, kleisins  
54 bind to SMC (structural maintenance complex) proteins to form a ring complex (Schleiffer et al.,  
55 2003) that interacts with chromosomes. In most bacteria and archaea, there is a single kleisin and  
56 SMC protein (Melby et al., 1998; Soppa, 2001). In the eukaryotes, kleisin and SMC proteins have  
57 duplicated and acquired specialized functions (Cobbe and Heck, 2004; Schleiffer et al., 2003).  
58 Kleisin- $\gamma$  proteins associate with Smc2/Smc4 heterodimers to form the condensin complex (Hirano,  
59 2012), which regulates chromosome structure in mitosis and meiosis. Kleisin- $\alpha$  proteins interact  
60 with Smc1/Smc3 heterodimers to form cohesin, the complex that holds sister chromosomes  
61 together (Nasmyth, 2002) and regulates the timing of chromosome segregation:  
62 cohesin holds chromosomes together from S phase, when DNA replication occurs, until the  
63 proteolytic cleavage of kleisin by separase opens the ring and allows sister chromosomes to  
64 separate from each other at anaphase.

65

66 Most eukaryotes have two different kleisin- $\alpha$  proteins. The mitotic kleisin holds sister  
67 chromosomes together in mitosis, whereas the meiotic kleisin is expressed only in meiosis (Mehta  
68 et al., 2012). Both kleisins interact with Smc1 and Smc3 but their proteolysis is regulated  
69 differently to produce the different patterns of chromosome segregation in mitosis and meiosis. In  
70 mitosis, the protease that cleaves kleisin is activated at anaphase leading to sister chromosome  
71 separation (Marston, 2014; Uhlmann et al., 1999; Uhlmann et al., 2000). In meiosis, however, the  
72 regulation of kleisin cleavage is modified to allow two rounds of chromosome segregation to  
73 follow a single round of DNA replication, producing four haploid genomes: in meiosis I, cleaving  
74 the kleisin on the chromosome arms allows homologous chromosomes to segregate from each  
75 other, and then in meiosis II, cleaving the remaining kleisin, near the centromeres, allows sister  
76 centromeres to segregate from each other (Buonomo et al., 2000; Marston, 2014). Both cohesin  
77 complexes have additional functions. Mitotic cohesin regulates chromosome condensation  
78 (Guacci et al., 1997; Lazar-Stefanita et al., 2017), gene expression (Donze et al., 1999), and DNA  
79 damage repair (Heidinger-Pauli et al., 2008; Wu and Yu, 2012) and meiotic cohesin regulates  
80 meiotic recombination (Brar et al., 2009; Klein et al., 1999) and chromosome topology

81 (Schalbetter et al., 2019). Most eukaryotes have both mitotic and meiotic kleisins, suggesting that  
82 the duplication and divergence of these paralogous proteins occurred at or soon after the  
83 evolutionary origin of the eukaryotes (Dorsett and Merckenschlager, 2013; Feeney et al., 2010;  
84 Peric-Hupkes and van Steensel, 2008).

85  
86 In the budding yeast, *Saccharomyces cerevisiae*, the functions of the mitotic and meiotic  
87 kleisins are not interchangeable. In this species, the mitotic kleisin is encoded by *SCC1*; the meiotic  
88 kleisin is encoded by *REC8*. Replacing the coding sequence of *REC8* by that of *SCC1* during  
89 meiosis disrupts meiotic chromosome segregation (Brar et al., 2009; Toth et al., 2000) and the  
90 opposite experiment, expressing *REC8* from the *SCC1* promoter in mitosis, slows cell proliferation  
91 (Buonomo et al., 2000). These results suggest that the functional difference between yeast kleisin  
92 proteins is mainly determined by the difference between their amino acid sequences rather than  
93 the promoters that control their expression. The ancient evolutionary separation of the mitotic and  
94 meiotic kleisins makes it hard to answer two questions: 1) which mutations in kleisin produced  
95 changes in its function rather than accumulating because of other selective forces or genetic drift  
96 and 2) what fraction of the mutations that altered kleisin function occurred in other proteins rather  
97 than kleisin itself.

98  
99 We used experimental evolution to ask how cells adapt when they are selected to use one  
100 protein for a function that is normally performed by its paralog. We substituted the budding yeast  
101 meiotic kleisin, *Rec8*, for its mitotic counterpart, *Scc1*, thus requiring *Rec8* to support mitotic  
102 rather than meiotic chromosome segregation. Can cells evolve to proliferate faster and more  
103 accurately while using *Rec8* for mitosis? If so, do the adaptive mutations occur in kleisin or  
104 elsewhere in the genome? We asked these questions by evolving parallel yeast populations that  
105 expressed *Rec8* in place of *Scc1* for 1750 mitotic generations. We recovered no mutations in *Rec8*,  
106 but found adaptive mutations in the transcriptional mediator complex, cell cycle regulators that  
107 induce the G1-to-S transition, and cohesin-related genes; these mutations restore sister  
108 chromosome cohesion and thus increase the fitness of the evolved populations. Unexpectedly, we  
109 found that replacing *Scc1* with *Rec8* leads to earlier firing of replication origins. All three classes  
110 of adaptive mutations restored the timing of genome replication to the wild-type pattern.  
111 Engineering mutations that reduced replication origin firing or slowed replication forks improved  
112 the fitness of *Rec8*-dependent cells, revealing a new link between genome replication and sister  
113 chromosome cohesion. Our results suggest that the fastest way of adapting a protein to a novel  
114 function can be to modify the partners it directly or indirectly interacts with, rather than modifying  
115 the protein that must acquire the new function

116  
117  
118  
119  
120  
121  
122  
123  
124  
125  
126

## 127 Results

128

### 129 Using the meiotic kleisin, Rec8, for mitosis leads to multiple defects

130

131 We examined the consequences of replacing Scc1 with Rec8 in the mitotic cell cycle (Fig.  
132 1A). Previous studies showed that replacing Scc1 with Rec8 impairs mitotic growth (Buonomo et  
133 al., 2000) and DNA damage repair (Heidinger-Pauli et al., 2008), showing that Rec8 cannot  
134 completely substitute for Scc1 in mitosis. We compared the reproductive fitness and the cellular  
135 and molecular phenotypes of the Rec8- and Scc1-expressing strains, referring to the Scc1-  
136 expressing strain as the wild type. We used competitive growth to measure the fitness of the Rec8-  
137 expressing strain relative to wild type in rich media: the fitness of the Rec8-expressing strain is  
138 only 55% that of wild type (Fig. 1B).

139

140 We examined sister chromosome cohesion and chromosome segregation in Rec8-  
141 expressing cells. Because cells mis-segregating chromosomes become progressively more  
142 aneuploid, we wanted to examine acute rather than chronic effects of replacing Scc1 with Rec8.  
143 We expressed *REC8* from the endogenous *SCC1* promoter and conditionally expressed an  
144 additional copy of *SCC1* from the *GAL1* promoter. The *GAL1* promoter is rapidly repressed by  
145 glucose (Flick and Johnston, 1990; Johnston et al., 1994), allowing us to repress *SCC1* expression  
146 rapidly and study the function of Rec8 in a single mitotic cell cycle. We confirmed that when *SCC1*  
147 is turned off, expressing Rec8 slows progress through the cell cycle (Fig. S1A). We assayed  
148 cohesion between sister chromosomes by following a single, GFP-tagged chromosome through  
149 mitosis. Chromosome V was labeled by the binding of a GFP-*tet* repressor fusion to an array of  
150 *tet* operators integrated near the centromere (Michaelis et al., 1997; Uhlmann and Nasmyth, 1998).  
151 We asked if Rec8 could hold sister chromosomes together from S phase to mitosis by following  
152 the GFP-labeled centromeres (henceforth GFP dots) under the microscope as cells were released  
153 from a G1 arrest, allowed to proceed synchronously through the cell cycle, and then arrested in  
154 mitosis by benomyl that depolymerizes microtubules. In this assay, a pair of linked sister  
155 chromosomes appears as a single GFP dot whereas sister chromosomes that have lost cohesion  
156 appear as two GFP dots (Fig. 1C). The fraction of cells with two GFP dots in a population indicates  
157 the degree to which sister chromosomes have separated. From S phase to mitosis, the majority of  
158 the wild-type population showed a single GFP dot as expected (Fig. 1C). In the Rec8-expressing  
159 strain, 10% of the population showed two GFP dots during S phase and this fraction rose to 50%  
160 in mitosis (Fig. 1C). During a single cell cycle, the defect in sister chromosome cohesion of the  
161 Rec8-expressing strain was smaller than the defect in a strain completely lacking Scc1 (Fig. 1C),  
162 showing that Rec8 retains some cohesin function.

163

164 Sister chromosomes must be linked to each other to allow their kinetochores to attach  
165 stably to opposite poles of the mitotic spindle. In this orientation, forces exerted on the  
166 kinetochores create tension that inactivates the spindle checkpoint, leading to activation of the  
167 anaphase-promoting complex, the activation of separase, the cleavage of kleisin, and the onset of  
168 anaphase (Marston, 2014). The Rec8-expressing strain frequently failed to correctly orient sister  
169 kinetochores (Fig. S2), a defect likely to cause errors in chromosome segregation (Fig. S1B). We  
170 hypothesized that the sister chromosome cohesion defect would activate the spindle checkpoint,  
171 thus prolonging mitosis. By tracking a G1-synchronized population, we found that the Rec8-  
172 expressing strain accumulated more cells with a 2C DNA content compared to wild type (Fig. 1D).

173 Removing Mad2, a spindle checkpoint protein (Li and Murray, 1991; Shah and Cleveland, 2000),  
174 from the Rec8-expressing strain, increases the fraction of cells with a 1C DNA content (from 90  
175 to 180 minutes, Fig. 1D), suggesting that the sister chromosome cohesion defect activates the  
176 spindle checkpoint. In addition, the Rec8-expressing strain showed a shorter S phase than the wild-  
177 type. This phenotype is not due to faster escape from a G1 arrest since budded cells accumulate  
178 with indistinguishable frequency in wild-type and Rec8-expressing strains (Fig. S3). Unexpectedly,  
179 the *mad2Δ*, Rec8-expressing strain progressed through S phase with similar kinetics to wild type  
180 (see Discussion). In cells lacking kleisin or the cohesin loading complex mutant, the timing of  
181 genome replication is identical to wild-type (Uhlmann and Nasmyth, 1998), suggesting that the  
182 accelerated genome replication is a specific feature of Rec8-expressing cells. In summary,  
183 replacing Scc1 with Rec8 leads to profound defects in sister cohesion and accelerates genome  
184 replication by an unknown mechanism.

185  
186 We asked whether the phenotype of Rec8-expressing cells could be explained by reduced  
187 cohesin levels or reduced cohesin binding to mitotic chromosomes. We measured Rec8 levels in a  
188 synchronous cell cycle and compared them with those of Scc1 (Fig. 2A). Scc1 was barely  
189 detectable in G1, peaked during S phase, and its cleavage product was detected at 60 minutes as  
190 cells entered anaphase. During G1 and S phase, there was four-fold less Rec8 than Scc1. At 90  
191 minutes, the Rec8 protein level decreased but we did not detect the cleavage product of Rec8,  
192 either because the onset of anaphase was asynchronous or the cleavage product is too unstable to  
193 be detected (Buonomo et al., 2000). The lower Rec8 protein level could be due to inefficient  
194 protein synthesis or protein instability. We tested the second hypothesis by examining the stability  
195 of Scc1 and Rec8 in mitotically-arrested cells: the half-life of Scc1 is 200 minutes whereas Rec8  
196 has a half-life of only 58 minutes (Fig. 2B). The instability of Rec8 is due to the weak separase  
197 activity that exists outside anaphase (Uhlmann et al., 1999): reducing separase activity with a  
198 temperature sensitive mutation, *esp1-1*, (Ho et al., 2015) increases the half-life of Rec8 to 190  
199 minutes.

200  
201 Finally, we compared the binding of Rec8 and Scc1 to chromosomes by chromatin  
202 immunoprecipitation (ChIP). In mitotically-arrested cells, immunoprecipitating Rec8 brought  
203 down less DNA at canonical cohesin binding sites than Scc1 (Fig. 2C). This was not only true for  
204 individual sites, but was also observed genome-wide. Calibrated ChIP-Seq revealed reduced levels  
205 of chromosomal Rec8 compared to Scc1 at peri-centromeres, where cohesin is most enriched,  
206 across all the sixteen chromosomes (Fig. 2D and Fig. S4A). Among all the chromosomes, the  
207 enrichment of Rec8 specifically at core centromeres is higher compared to that of Scc1, but lower  
208 in the flanking peri-centromeres (Fig. 2D and Fig. S4B). This suggests that Rec8-containing  
209 cohesin is less efficient than Scc1 in translocating from its loading site at centromere. The reduced  
210 overall binding of Rec8 on mitotic chromosomes might be partially explained by the lower Rec8  
211 level in mitosis (Fig. S5A). To test this idea, we asked whether equivalent amounts of ectopically  
212 produced Rec8 and Scc1 can be loaded on chromosomes in G1. Although Scc1 is not normally  
213 expressed until the onset of S phase, ectopically expressing Scc1 in G1 allows cohesin to be loaded  
214 on chromosomes (Fernius et al., 2013). We expressed Rec8 or Scc1 from the *GALI* promoter in  
215 G1-arrested cells and measured their chromatin association by ChIP-qPCR. Although the levels of  
216 ectopically produced Rec8 was slightly elevated compared to that of Scc1 (Fig. S5B), it showed  
217 reduced accumulation on canonical cohesin binding sites (Fig. 2E). We conclude that Rec8 both  
218 is less stable and, independently, associates less well with chromosomes compared to Scc1. We

219 suggest that these molecular defects lead to defective sister cohesion, errors in chromosome  
220 segregation, and slower passage through mitosis, leading to the production of dead and aneuploid  
221 cells, thereby reducing the fitness of Rec8-expressing cells.

222  
223

## 224 **Experimental evolution increases the fitness of Rec8-expressing strains**

225

226 To study how cells adapt to a protein that performs an essential function poorly, we asked  
227 if experimental evolution would allow Rec8-expressing cells to acquire mutations that would  
228 improve their fitness; these mutations could occur either in *REC8* or elsewhere in the yeast genome.  
229 We constructed fifteen ancestral clones, each containing a deletion of the chromosomal *SCC1* gene  
230 and a centromeric plasmid expressing *REC8* from the *SCC1* promoter (*P<sub>SCC1</sub>-REC8*). Ancestral  
231 clones were inoculated into rich medium at 30°C and each culture was diluted 6000-fold into fresh  
232 medium once it reached saturation. This process was repeated, freezing samples every 125  
233 generations, until the populations reached 1750 generations (Fig. 3A). At generation 375, the  
234 fitness of all the evolved populations had increased by 20-30% relative to the Rec8-expressing  
235 ancestor. At the end of the experiment, the fitness of the evolved populations was 30-80% greater  
236 than that of the ancestor and the fitness of two evolved populations (P13 and P15) was similar to  
237 the wild-type strain (Fig. 3B and Fig. S6).

238

239 To identify adaptive mutations, we sequenced the genomes of five ancestral clones and  
240 pooled genomes of fifteen evolved populations at generation 375 and generation 1750 (Sup File  
241 1). We focused on non-synonymous mutations that were present at a frequency  $\geq 90\%$  in any  
242 evolved population. The evolved populations had an average of nine mutations at generation 375  
243 and 17 mutations at generation 1750 that met this criterion. We did not find any mutations in *REC8*,  
244 either in the coding sequence or the DNA 500 bp upstream and downstream of the ORF, but we  
245 did find multiple mutations in three functional modules: the transcriptional mediator complex,  
246 cohesin and its regulators, and regulators of cell cycle progression from G1 to S phase. At  
247 generation 375, fourteen out of fifteen evolved populations had a mutation in the transcriptional  
248 mediator complex, and four populations had mutations in the other two cohesin subunits, *SMC1*  
249 and *SMC3*, or separase, *ESP1* (Fig. S6 and Table S1). At generation 1750, the early mediator  
250 mutations were still fixed, one population had acquired a mutation in a second mediator subunit  
251 (*SRB8*) and one population still lacked a mediator mutation (Fig. S6 and Table S2). Twelve out of  
252 the fifteen mediator mutations targeted the Cdk8 complex, a regulatory module of mediator, and  
253 nine of these twelve mutations produced early stop codons (Fig. 3C). Mutations in cohesin-related  
254 genes were common at generation 1750: *SMC3*, *SMC1*, and *ESP1* were mutated in seven, two, and  
255 four evolved populations respectively (Fig. 3C). Seven populations had mutations in one of these  
256 genes, three populations had mutations in two genes and five populations had not acquired  
257 mutations in any cohesin-related gene by generation 1750. Four genes (*MBP1*, *CLN2*, *SWI6*, and  
258 *SWI4*) controlling the cell cycle transition from G1 to S were mutated in a total of six populations  
259 at generation 1750 (Fig. 3C). In summary, nine out of the fifteen evolved populations acquired  
260 mutations both in the mediator complex and cohesin-related genes (Fig. S6). Only the three fittest  
261 populations had mutations in all three classes (cohesin-related, mediator, and G1-to-S regulators)  
262 and the fitness of two of these populations, P13 and P15, approached that of wild type (Fig. S6).

263

264 In addition to point mutations, many evolved populations were aneuploid (Fig. 3D). The  
265 five ancestral clones we sequenced had an extra copy of chromosome I, the smallest chromosome  
266 in budding yeast. We think this reflects a combination of three factors, a very high frequency of  
267 chromosome mis-segregation in the ancestral Rec8-expressing cells, preferential mis-segregation  
268 of smaller chromosomes, and the small fitness cost of an extra copy of chromosome I (Torres et  
269 al., 2007). At generation 375, twelve populations had independently gained an extra copy of  
270 chromosome IX, and five also had an extra copy of chromosome I or chromosome III. The other  
271 three were true haploids, with one having lost the extra copy of chromosome I that was present in  
272 its ancestor. At generation 1750, seven populations retained two copies of chromosome IX while  
273 the rest had become true haploids. Disomy for chromosome IX causes a slight fitness cost in wild  
274 type (Torres et al., 2007), but in our evolution experiment, the prevalence and persistence of  
275 chromosome IX disomes suggests that an extra copy of chromosome IX in Rec8-expressing cells  
276 is adaptive.

277  
278 The genetic alterations we found are specific to yeast cells adapting to expressing Rec8  
279 rather than Scc1. Mutations in transcriptional mediator, cohesin-related genes, and the G1-to-S  
280 regulators have not been seen at frequencies that suggest they are adaptive in previous  
281 experimental evolution studies in *S. cerevisiae* (Jerison et al., 2017; Kryazhimskiy et al., 2014;  
282 Laan et al., 2015; Lang et al., 2013). In evolution experiments that improve the growth of haploid  
283 yeast in rich medium, the most frequent ploidy change seen is diploidization (Gerstein et al., 2006;  
284 Kryazhimskiy et al., 2014), instead of gaining an extra copy of a specific chromosome, which has  
285 been seen for cells adapting to the absence of myosin (Rancati et al., 2008) and growth at high  
286 temperature (Yona et al., 2012).

287  
288  
289 **Reconstruction confirms that candidate mutations are adaptive**

290  
291 We tested the effect of putative causative mutations by engineering them, individually, into  
292 the Rec8-expressing ancestor and examining the fitness and phenotypes of the resulting strains.  
293 We focused on four groups of genetic changes: mutations in transcriptional mediator, cohesin  
294 components, regulators of the G1-to-S transition, and an extra copy of chromosome IX. Mutations  
295 in the transcriptional mediator complex primarily targeted the Cdk8 complex: of its four  
296 components, *SSN2* was mutated five times, *SSN3* and *SSN8* were each mutated twice, and *SRB8*  
297 was mutated three times. Nine out of these twelve mutations led to early stop codons, suggesting  
298 that these mutations inactivate the module's function. The mediator complex links the basic  
299 transcriptional machinery with transcription factors and controls various events in transcription,  
300 including transcriptional initiation, pausing, elongation, and the organization of chromatin  
301 structure (Allen and Taatjes, 2015). The Cdk8 kinase module of mediator can positively or  
302 negatively regulate transcription (Nemet et al., 2014). We reconstructed mutations in three  
303 subunits (*SSN2*, *SSN3*, and *SSN8*) of the Cdk8 module. Each increased the fitness of the ancestor  
304 by 8-25% (Fig. 4A). Deleting the above genes also increased the fitness of the ancestor (Fig. 4A),  
305 strongly suggesting that these evolved mutations are loss-of-function mutations. Of the mutations  
306 targeting cell cycle regulators, one of three mutations in *MBP1* and two of three mutations in *CLN2*  
307 caused early stop codons. We therefore mimicked the effect of these mutations by deleting the  
308 corresponding gene: *mbp1Δ* and *cln2Δ* increased the fitness of the ancestor by 20% and 25%,  
309 respectively (Fig. 4B).



310

311 The mutations in cohesin-related genes affect essential genes and are thus unlikely to  
312 eliminate the function of these genes. Individual mutations in *ESPI*, *SMC1*, and *SMC3* increased  
313 the fitness of the Rec8-expressing ancestor by 15-31%, 14%, and 21% respectively (Fig. 4C). Our  
314 finding that Rec8 is sensitive to separase activity in mitosis (Fig. 2B) raised the possibility that  
315 evolved *esp1* mutations are hypomorphic alleles that weaken separase activity. We tested this  
316 hypothesis by expressing an extra wild-type copy of *ESPI* in two evolved populations carrying  
317 *esp1* mutations and their ancestors. As predicted, the extra copy of *ESPI* reduced the growth of  
318 these two evolved populations but not their ancestors (Fig. 4D), suggesting that these evolved *esp1*  
319 mutations are hypomorphic. Consistent with this hypothesis, compromising separase activity by  
320 using a known temperature-sensitive mutation, *esp1-1* (Ho et al., 2015), increased the growth of  
321 the Rec8-expressing ancestor at the permissive temperature (Fig. S7).

322

323 The prevalence of chromosome IX disomy in our evolved populations suggested that two  
324 copies of chromosome IX confer a selective advantage on Rec8-expressing strains. Aneuploidy  
325 has been adaptive in several evolution experiments by increasing the copy number of a specific  
326 gene (Mangado et al., 2018; Rancati et al., 2008; Sunshine et al., 2015; Voordeckers et al., 2015).  
327 Chromosome IX encodes a candidate gene, *SCC3*, whose protein product promotes cohesin  
328 association with chromosomes (Roig et al., 2014) by interacting with the cohesin loading complex  
329 (Orgil et al., 2015) and Scc1 (Li et al., 2018). We asked if an extra copy of *SCC3*, in the absence  
330 of the other genes on chromosome IX, could increase the fitness of the Rec8-expressing ancestor.  
331 We integrated an extra copy of *SCC3* in the ancestor and found that this manipulation increased  
332 its fitness by 10% (Fig. 4C), demonstrating that an extra copy of *SCC3* is sufficient to increase  
333 fitness. To test if an extra copy of *SCC3* is also necessary for increasing fitness, we deleted one  
334 copy of *SCC3* in clones from seven evolved populations that carried two copies of chromosome  
335 IX at generation 1750, reducing their fitness by 8 to 28% (Fig. 4E). We conclude that an extra  
336 copy of *SCC3* explains much of the selective advantage of carrying an extra copy of chromosome  
337 IX.

338

339

### 340 **Adaptive genetic changes restore sister chromosome cohesion**

341

342 Do the adaptive mutations in Rec8-expressing strains increase fitness by improving sister  
343 cohesion? We engineered individual mutations into a Rec8-expressing strain containing a GFP-  
344 labeled chromosome V and *P<sub>GALI</sub>-SCC1* and examined sister chromosome cohesion after acute  
345 depletion of Scc1. Individually deleting three subunits in the Cdk8 complex partially rescued the  
346 sister chromosome cohesion defect in cells where Rec8 was the only  $\alpha$ -kleisin present (Fig. 5A  
347 and Fig. S8). Amongst these genes, deleting *SSN3*, the kinase subunit of the Cdk8 complex,  
348 produced the greatest improvement in sister cohesion, comparable to the effect of the adaptive  
349 mutations in cohesin-related genes (*SMC1*, *SMC3*, or *ESPI*) or deleting the two genes that promote  
350 exit from G1, *CLN2* and *MBP1* (Fig. 5A). An extra copy of *SCC3*, whose effect on fitness  
351 mimicked the chromosome IX disome, slightly improved sister cohesion (Fig. 5A). Each evolved  
352 mutation also improved the accuracy of chromosome segregation in Rec8-expressing cells with  
353 cohesin-related mutations having stronger effects than mediator mutations (Fig. S9). We conclude  
354 that mutations in transcriptional mediator, other cohesin components and separase, and cell cycle  
355 regulators can improve sister chromosome cohesion in Rec8-expressing cells.

356  
357  
358  
359  
360  
361  
362  
363  
364  
365  
366  
367  
368  
369  
370  
371  
372  
373  
374

We investigated the interactions between adaptive mutations in different functional modules. The fitness of the evolved population P15 approached that of wild type at generation 1750 and it had acquired mutations in four genes (*ssn2*, *esp1*, *smc1*, and *mbp1*) representing effects on mediator, separase, cohesin, and the G1-to-S transition. We investigated the interaction between these four mutations. To examine fitness and sister chromosome cohesion, we constructed double mutants in the strain carrying a GFP-labeled chromosome V and *P<sub>GALI</sub>-SCC1*. For fitness, we saw two types of interactions: double mutations between any of *ssn2* $\Delta$ , *mbp1* $\Delta$ , and *smc1*-P15 had a fitness that was indistinguishable from the sum of the effects of the individual mutations (Fig. 5B-D), whereas the *esp1*-P15 *ssn2* $\Delta$  and *esp1*-P15 *mbp1* $\Delta$  double mutants were substantially fitter than the sum of the fitness increases in the individual mutants (Fig. 5E and 5F). For sister chromosome cohesion, all the double mutants had smaller defects in sister chromosome cohesion than either single mutant with the exception of the *mbp1* $\Delta$  *esp1*-P15 and *mbp1* $\Delta$  *smc1*-P15 double mutants (Fig. 5C and 5F), whose level of sister chromosome cohesion was either indistinguishable from or only slightly above that of the single mutants. This result suggests that *mbp1* $\Delta$  may have additional effects on fitness that are not mediated by improving sister chromosome cohesion. Overall, the interactions between mutations in different modules are additive or positively synergistic at the level of fitness and more complex at the level of sister cohesion.

375  
376  
377  
378  
379  
380  
381

We asked if the adaptive mutations altered the abundance of Rec8. We measured the Rec8 protein level in mitosis in seven strains, each containing an adaptive mutation in a different gene that appeared during our evolution experiment and was shown to increase the fitness of Rec8-expressing cells (Fig. S10). None of the mutations changed the level of Rec8, demonstrating that these adaptive mutations improve sister cohesion not by changing the amount of Rec8.

382  
383

### **Adaptive genetic changes slow down S phase and improve sister cohesion**

384  
385  
386  
387  
388  
389  
390  
391  
392  
393  
394  
395  
396  
397  
398

Cell cycle progression profiles showed that the ancestral Rec8-expressing strain had shorter S phase than that of wild type (Fig. 1D). Since the linkage between sister chromosomes is established in S phase (Uhlmann and Nasmyth, 1998) and all the adaptive mutations improved sister chromosome cohesion in the Rec8-expressing strain, we asked if these mutations also affected the dynamics of genome replication. By tracking cell cycle progression after release from a G1 arrest, we found deletions of three subunits in the Cdk8 complex and mutations in *SMC1*, *SMC3*, or *ESP1* slowed S phase of the Rec8-expressing strain (Fig. 6A). We quantified the fraction of cells in S phase 30 minutes after release from a G1 arrest: 39% of wild-type cells were in S phase, whereas 57% of the Rec8-expressing cells were in S phase. In the Rec8-expressing strain, deleting genes encoding the subunits of the Cdk8 complex decreased the fraction of cells in S phase to between 50 and 33% and mutations in *SMC1*, *SMC3*, and *ESP1* decreased this fraction to between 40% and 17% (Fig. 6B and Fig. S11). The budding index of these reconstructed strains are comparable to those of both the wild-type and Rec8-expressing strains (Fig. S12), confirming that none of the mutations affect the timing of Start after release from a G1 arrest.

399  
400  
401

We asked how Rec8 altered genome replication and how individual adaptive mutations restored the tempo of genome replication to that of wild-type cells. We constructed a whole genome replication profile by genome sequencing multiple time points of a synchronized yeast

402 population proceeding through S phase (Saayman et al., 2018). By analyzing changes in read depth  
403 during S phase, we calculated  $T_{rep}$ , the time at which 50% of cells in a population complete  
404 replication at a given genomic locus. The profile of  $T_{rep}$  across the yeast genome reveals the  
405 dynamics of replication: the peaks mark points at which replication initiates, namely a fired  
406 replication origin, and the slopes show the speed of the replication forks that move away from the  
407 origins. We compared the replication profiles of wild type, *scc1* $\Delta$ , Rec8-expressing, and  
408 reconstructed strains that express Rec8 and carry a single adaptive mutation in one of three genes:  
409 *ssn3* $\Delta$ , *esp1-P15*, or *smc1-P15*. Compared to the wild-type, the Rec8-expressing strain fired many  
410 but not all replication origins earlier, and on average an origin fired four minutes earlier in the  
411 Rec8-expressing cells. In contrast, the temporal order of origin firing and the speed of replication  
412 forks were similar to those in wild type. Because origins that fire earlier are less likely to be  
413 inactivated by the nearby origins and therefore replicate DNA more efficiently (Bell and Labib,  
414 2016), this result is consistent with the earlier S-phase of the Rec8-expressing strain. The  
415 replication profile of *scc1* $\Delta$  strain was indistinguishable from that of the wild-type (Fig. S13).  
416 Three adaptive mutations we examined delayed origin firing to various degrees: *ssn3* $\Delta$  or *esp1-*  
417 *P15* almost restored the pattern of origin firing to that of the wild-type. *smc1-P15* made the firing  
418 of many origins later than those of wild type (Fig. 6E and Fig. S14). Overall, the replication profiles  
419 of these reconstructed strains are more similar to the genome-wide pattern of wild type rather than  
420 that of the Rec8-expressing strain. We concluded that expressing Rec8 in mitosis advances the  
421 timing of origin firing and therefore Rec8-expressing cells begin and finish genome replication  
422 earlier than wild type. Mutations in genes encoding the Cdk8 complex, cohesin and separase slow  
423 down the S phase of the Rec8-expressing strain by delaying origin firing. In *Scc1*-expressing cells,  
424 deleting the genes encoding the subunits of the Cdk8 complex extended S phase and led to an 8-  
425 11% fitness reduction (Fig. S16), demonstrating that transcriptional mediator affects genome  
426 replication, even in the absence of Rec8, through an uncharacterized mechanism.

427  
428 The correlation between slower genome replication and improved sister chromosome  
429 cohesion suggests that the dynamics of genome replication affect cohesion. Cohesin must be  
430 loaded onto chromosomes prior to, or concomitant with the passage of the replication fork to be  
431 converted into functional cohesion (Uhlmann and Nasmyth, 1998) and delaying origin firing  
432 promotes the establishment of cohesive linkages near centromeres in a kinetochore mutant  
433 defective in cohesin accumulation at centromeres (Fernius and Marston, 2009). Based on these  
434 observations, we hypothesized that slowing down genome replication would improve Rec8-  
435 dependent sister chromosome cohesion. To test this idea, we asked if manipulations that slow  
436 genome replication improve sister chromosome cohesion and the fitness of the Rec8-expressing  
437 strain, potentially by allowing more time for cohesin to load prior to replication fork passage. We  
438 found that both decreasing origin firing and slowing the movement of replication forks improved  
439 sister cohesion. Removing the two S phase cyclins, Clb5 and Clb6, which delay replication origin  
440 firing (Donaldson et al., 1998; Schwob and Nasmyth, 1993), or reducing the speed of replication  
441 forks by removing Rrm3, a helicase involved in DNA replication (Azvolinsky et al., 2006), halved  
442 the sister cohesion defect in Rec8-expressing cells (Fig. 6C) and increased their fitness by 31%  
443 (*clb5* $\Delta$  *clb6* $\Delta$ ) and 24% (*rrm3* $\Delta$ ) (Fig. 6D). Slowing genome replication with hydroxyurea (HU),  
444 which lowers the concentration of deoxyribonucleotide triphosphates (dNTPs), also improved  
445 sister cohesion and fitness (Fig. 6C and Fig. S17). We infer that in Rec8-expressing cells, the Cdk8  
446 and cohesin-related mutations exert at least part of their effects by slowing genome replication and  
447 thus improving sister cohesion (Fig. 7).

448

449

## 450 Discussion

451

452

453

454

455

456

457

458

459

460

461

462

463

464

465

466

467

468

469

470

471

472

473

474

475

476

477

478

479

480

481

482

483

484

485

486

487

488

489

490

491

492

493

We used experimental evolution to study how cells adapt to the demand that a protein performs an altered function. Budding yeast adapt to use the meiotic kleisin, Rec8, which normally functions in meiosis, to maintain the sister chromosome linkage required for accurate mitotic chromosome segregation. Whole genome sequencing of the adapted populations failed to reveal mutations in *REC8* but identified adaptive mutations in three functional modules: the transcriptional mediator complex, cohesin structure and regulation, and cell cycle regulation. Individually, these mutations slow genome replication, improve sister cohesion, and increase the fitness of the ancestral Rec8-expressing strain. Engineering mutations that delay the firing of replication origins or slow the speed of replication forks into the ancestral Rec8-expressing strain, increased sister chromosome cohesion and fitness, demonstrating a causal link between genome replication and sister chromosome cohesion. Our work suggests that mutations, both in the components and regulators of cohesin and in other proteins, which were not previously implicated in chromosome cohesion, improve the ability of the meiotic kleisin to function in mitosis, despite the passage of a billion years since the divergence between mitotic and meiotic kleisins.

What distinguishes the cellular functions of Scc1 and Rec8? Cells that are forced to use Rec8 in mitosis have multiple defects that account for their reduced fitness. In G1, ectopically-expressed Rec8 associates more weakly with chromosomes than Scc1 does. This defect may reduce the ability to productively load Rec8-containing cohesin on chromosomes. In mitotically-arrested cells, Rec8 is less stable than Scc1, binds less well to peri-centromeres and chromosomal arms, and shows increased binding specifically at core centromeres. We suggest that the reduced pericentromeric binding in mitotically-arrested cells destabilizes sister chromosome cohesion. This reduced stability of Rec8 is partially due to separase activity: populations acquired hypomorphic alleles of separase and a temperature-sensitive separase mutant stabilized Rec8 in mitotically-arrested cells. Rec8's genome-wide binding pattern suggests Rec8 does not associate with chromosomes in the same way to Scc1. Cohesin binding to chromosomes is initiated by cohesin loading, which is either specifically targeted to centromeres and dependent on the Ctf19 kinetochore complex (Hinshaw et al., 2017; Hinshaw et al., 2015), or generally loaded genome-wide. Following loading, cohesin translocates to other parts of chromosomes (Hu et al., 2011; Lengronne et al., 2004). In mitosis, Rec8's increased binding at centromeres and reduced binding at peri-centromeres suggests that Rec8-containing cohesin can be targeted to centromeres but cannot translocate efficiently to the peri-centromeric borders, where most of Scc1-containing cohesin accumulates to generate linkages between sister chromosome (Paldi et al., 2019). In meiosis, the difference in the stability of the linkage with the two forms of cohesin is reversed: Scc1 near centromeres is not protected from separase activity whereas Rec8 is (Toth et al., 2000). Since the other cohesin subunits and cohesin regulators are present in both the mitotic and meiotic cell cycles, these differences must be due to differential modification of the known cohesin regulators or additional components that interact differently with Rec8 and Scc1. Why can't Rec8 fully substitute for Scc1 in the mitotic cell cycle? Our results do not distinguish between two possibilities: i) there is a fundamental incompatibility between the functions that kleisins perform in mitosis and meiosis and this incompatibility forced these two kleisin paralogs to diverge from each other, and ii) mutations that impaired Rec8's ability to support mitosis accumulated by

494 genetic drift rather than selection. In either case, our work reveals the power of a variety of adaptive  
495 mutations, affecting diverse modules, to alter the function that a protein performs.

496  
497 What accounts for the genes that acquired adaptive mutations and the order in which  
498 mutations appear? We argue that the answer is a combination of the benefit conferred by mutations  
499 in a gene and the target size for these beneficial mutations. The mutations in the transcriptional  
500 mediator complex and genes regulating G1-to-S transition are likely to be strong loss-of-function  
501 mutations: many of the mutations are nonsense mutations and gene deletions mimic the effect of  
502 the evolved mutations. Two arguments suggest that the mutations in cohesin and its regulators are  
503 different: these are essential genes and their mutations accumulate later in evolution than the  
504 mediator mutations even though they produce similar fitness increases. This delay is consistent  
505 with the target for adaptive, cohesin-related mutations being smaller than the target for inactivating  
506 mediator. Genetic evidence suggests that the mutations in separase are mild loss-of-function  
507 mutations, but the effect of mutations in Smc1 and Smc3 are unclear. Mutations in these proteins  
508 can directly alter their interactions with kleisin, but any mutation that disrupts the essential  
509 biochemical activity of cohesin will be lethal. We argue that the number of mutations that change  
510 the regulation of the cohesin complex but not its essential activity is small, explaining the later  
511 accumulation of these mutations.

512  
513 We argue that considering the target size for different mutations explains why we saw no  
514 mutations in Rec8. Since Rec8 and Scc1 have diverged substantially roughly a billion years, it may  
515 require multiple, simultaneous amino acid substitutions in Rec8 to improve its ability to hold  
516 mitotic sister chromosomes together. Even if single amino acid substitutions in Rec8 can improve  
517 its function in mitosis, there are unlikely to be many such mutations and the selective advantage  
518 conferred by individual mutations is likely to be modest. In contrast, the target size for inactivating  
519 mutations, such as those in mediator and the G1-to-S regulators, are large. If the mutations in  
520 *SMC1*, *SMC3*, and *ESP1* reduce some aspect of their function, the target size for mutations in these  
521 genes will be larger than the target size for mutations that improve Rec8's mitotic function. Our  
522 results are consistent with other studies where loss-of-function mutations are the first step in  
523 adaptation in laboratory evolution experiments (Hottes et al., 2013; Koschwanez et al., 2013; Laan  
524 et al., 2015; Wildenberg and Murray, 2014).

525  
526 Mutational target size is likely to explain why adaptive mutations often occur outside the  
527 gene whose product is being asked to perform a different function. When *E. coli* is experimentally  
528 evolved to use an enzyme that normally participates in proline synthesis, ProA, to catalyze a  
529 similar reaction in arginine synthesis, most of the adaptive mutations are in other genes of arginine  
530 synthesis pathway, not in ProA (Morgenthaler et al., 2019). Mutations outside the focal gene are  
531 also found when proteins are asked to perform the same function in a novel cellular environment.  
532 Thus *E. coli* adapts to use orthologs of the *folA* gene, which encodes dihydrofolate reductase, via  
533 mutations in genes responsible for protein degradation rather than mutations in the *folA* ortholog  
534 (Bershtein et al., 2015). We suggest that evolutionary changes in a protein's function reflect a  
535 mixture of changes in its sequence and expression, changes in the proteins that it physically  
536 interacts with, and changes in other proteins that contribute to the biological function under  
537 selection. The number and diversity of these connections makes it difficult to predict the  
538 evolutionary trajectories that populations will follow as proteins are selected to perform new  
539 functions. Thus, evolutionary repair experiments are a strategy to learn more about the factors that

540 regulate protein function and reveal previously unknown links between different functional  
541 modules.

542  
543 Mutations in three functional modules, transcriptional mediator, chromosome cohesion,  
544 and cell cycle regulation improve the fitness and chromosome segregation of Rec8-expressing  
545 cells. We used double mutants to probe the interactions between these modules, scoring both  
546 fitness and sister cohesion. Most pairs of mutations interacted roughly additively for both  
547 phenotypes, with some exceptions: double mutations with *esp1-P15* were substantially fitter than  
548 the additive expectation and double mutations with *mbp1Δ* increased fitness but did not improve  
549 sister cohesion, suggesting that this mutation has effects on both sister cohesion and some other  
550 function. None of the adaptive mutations increase the total level of Rec8 in mitotically-arrested  
551 cells, suggesting that they likely alter the ability of Rec8-containing cohesion to form and maintain  
552 the linkages that hold sister chromosomes together.

553  
554 Our work reveals a new regulatory link between sister cohesion and genome replication.  
555 The Rec8-expressing strain advances the timing of genome-wide origin firing and completes  
556 genome replication earlier than wild type. All the adaptive mutations we tested extend S phase and  
557 improve sister cohesion. We found deletion of the Cdk8 gene, separase mutation, and cohesin  
558 mutation all restore the pattern of origin firing towards that of wild type. This result is consistent  
559 with multiple populations acquiring mutations that inactivate genes (*MBP1*, *CLN2*, *SWI4*, and  
560 *SWI6*) that promote passage from G1 to S phase. We speculate that slowing genome replication  
561 can promote sister cohesion in the Rec8-expressing strain. We tested the causality of this linkage  
562 using mutants that reduce origin firing or slow replication forks: both manipulations improve the  
563 fitness and sister chromosome cohesion of Rec8-expressing cells, demonstrating that slower  
564 replication raises fitness. A recent study demonstrated that Mad2, the spindle checkpoint protein,  
565 regulates S phase by promoting translation of Clb5 and Clb6 (Gay et al., 2018), potentially  
566 explaining why *mad2Δ* also extends the S phase of Rec8-expressing cells. Our work demonstrates  
567 that mitotic sister chromosome cohesion can be improved by mutations that slow genome  
568 replication. The simplest explanation of this effect is that slower replication allows more time for  
569 Rec8-containing cohesin to associate with chromosomes either before or during the passage of the  
570 replication fork.

571  
572 Our work leads to a number of questions. Why does expressing Rec8 advance the timing  
573 of origin firing while removing Scc1 has no effect? How do mutations in transcriptional mediator  
574 and cohesin-related genes affect replication? Are the effects of Rec8 on replication in the mitotic  
575 cycle related to its reported ability to stimulate genome replication in the meiotic cycle (Cha, 2000)?  
576 In early S phase, replication initiation is orchestrated by a series of molecular interactions: the  
577 proteins that activate DNA replication, like S-phase cyclin-dependent kinase (CDK) and Dbf4-  
578 dependent kinase (DDK), recruit several initiation factors to form an activated helicase complex  
579 (Bell and Labib, 2016). Cells can control the timing of origin firing by modifying the activity of  
580 these activators, limiting the dosage of replication initiation factors (Mantiero et al., 2011) or  
581 changing local chromatin structure which affects how easily these regulators can access a given  
582 origin (Aparicio, 2013; Boos and Ferreira, 2019). Further research is needed to determine whether  
583 Rec8 affects replication by increasing the expression of genes that control replication initiation or  
584 altering chromatin structure to make replication origins more accessible to initiation factors, or  
585 some combination of both. The combination of overexpressing four initiation factors and reducing

586 chromatin compactness accelerates the firing of late replication origins, demonstrating that these  
587 factors can alter the dynamics of replication (Mantiero et al., 2011).

588  
589 The most pressing question is how mutations in the transcriptional mediator complex, the  
590 major target of early adaptive mutations, alter the timing of genome replication and increase the  
591 fitness of Rec8-expressing cells. There are suggestions that transcriptional mediator is involved in  
592 genome replication. In budding yeast, genes of the Cdk8 complex have genetic interactions with  
593 genes that trigger replication initiation (*DBF4*, *DPB11*, *SLD3*, and *CDC7*) and core helicase  
594 components (*SLD5*) (Costanzo et al., 2016). In fission yeast (Banyai et al., 2017) and mammalian  
595 cells (Kohler et al., 2019), mutations of the Cdk8 complex are reported to alter genome replication,  
596 suggesting our finding that the Cdk8 module is involved in genome replication is not species  
597 specific, although the detailed mechanism remains unknown.

598  
599 Overall, this evolution experiment shows that mutations outside the meiotic kleisin, Rec8,  
600 improve its ability to support mitotic chromosome segregation. We argue that the distinct functions  
601 of mitotic and meiotic kleisins evolved through a mixture of changes in kleisin itself and changes  
602 in other functional modules that regulate sister chromosome cohesion directly or indirectly. At  
603 least in laboratory experiments, the size and complexity of this molecular network provides a much  
604 larger target for mutations that alter the biological function of kleisin than the target presented by  
605 kleisin itself. We suggest that the functional divergence of paralogous proteins depends on a  
606 mixture of mutations in the paralogs and the proteins that they directly or indirectly interact with.

607  
608

## 609 **Materials and Methods**

### 610 611 **Yeast Strains, Plasmids, and Growth Conditions**

612 All yeast strains are derivatives of W303, and their genotypes are listed in Supplementary  
613 File 2. For the yeast strain with a GFP labeled chromosome V and  $P_{GALI}$ -*SCC1*, yPH344 and  
614 yPH345 are haploid strains derived from a diploid strain that made from a cross between FY1456  
615 (the same strain as K2789, a gift from Dana Brnzei) and yPH36. yPH346 is a haploid strain  
616 derived from a diploid strain that made from a cross between FY1456 and yPH115. Strains  
617 carrying *REC8* integrated at the endogenous *SCC1* locus were generated by homologous  
618 recombination: A *REC8*-3xHA fragment was amplified from the plasmid pFA6a-*REC8*-3xHA-  
619 *KANMX4*, fused with 500 bp upstream and downstream DNA fragments of *SCC1* coding sequence  
620 by PCR, and recombined with the *SCC1* genomic locus. Strains used in the evolution experiment  
621 were generated from yPH280 by plasmid shuffling (Lundblad and Zhou, 2001). Standard rich  
622 medium, YPD (1% Yeast-Extract, 2% Peptone, and 2% D-Glucose) was used for the evolution  
623 experiment. Growth conditions for each experiment are specified in the figure legends. Raffinose  
624 and Galactose were used at 2%. Benomyl was used at 30 $\mu$ g/ml. Cycloheximide was used at  
625 35 $\mu$ g/ml.  $\alpha$ -factor was used at 10 $\mu$ g/ml for *bar1* strains and at 100 $\mu$ g/ml for *BARI* strains.  
626 Methionine was used at 8mM.

### 627 628 **Experimental Evolution**

629 The haploid strain used in the evolution experiment was *MAT $\alpha$  scc1 $\Delta$  pRS414-P<sub>SCC1</sub>-*  
630 *REC8*-HA. To force yeast cells depend on Rec8 for mitotic growth, five clones of yHP280 (*MAT $\alpha$*   
631 *scc1 $\Delta$  pRS414-P<sub>SCC1</sub>-REC8*-HA pRS416-*SCC1*) were cultured in YPD to lose pRS416-*SCC1* and

632 cells without the *SCCI*-bearing plasmid were selected by the growth on 5-FOA plates. For each  
633 of the five clones, three independent 5-FOA resistant colonies were chosen, giving rise to the  
634 fifteen ancestral clones in the evolution experiment. Each ancestral clone was cultured in 3ml YPD  
635 to reach  $10^8$  cells/ml at 30°C and diluted 1:6000 into a tube with 3ml fresh YPD and incubated for  
636 48 hrs (before generation 375) or 24 hrs (after generation 375). Each subsequent cycle used the  
637 same dilution. We estimated an effective population size of  $6.3 \times 10^5$  cells using this formula  
638 (Lenski et al., 1991),  $N_e = N_o \times g$ , in which  $N_o$  is the initial population size ( $5 \times 10^4$  cells) and  $g$   
639 is the number of generations, 12.6, during one cycle. After every ten cycles, 1ml culture was mixed  
640 with 500µl 80% Glycerol and frozen at -80°C. The evolution experiment was continued for 1750  
641 generations.

642

### 643 **Fitness measurement by competition assay**

644 An ancestral *P<sub>SCCI</sub>-REC8* strain that expressed a fluorescent protein, mCitrine, under the  
645 *ACT1* promoter was used as the reference strain (yPH447) in fitness competition assays with  
646 evolved populations and reconstructed strains carrying a single evolved mutation. For scoring  
647 fitness and sister cohesion in the same strain carrying a GFP-labeled Chr. V, a Rec8-expressing  
648 strain with *P<sub>ACT1</sub>-mCherry* (yPH472) was used as the reference strain.

649

650 All sample strains and reference strain were grown to  $<10^7$  cells/ml in YPD; cell density  
651 was measured using a Coulter Counter (Beckman Coulter). At the first time point, samples strains,  
652 either evolved strains or reconstructed strains carrying evolved mutations, were mixed with the  
653 reference strain at a ratio of 1:10. The initial cell mixture was diluted to  $5 \times 10^4$  cells/ml in YPD  
654 and grown for 24 hours. At the second time point, the cell density was usually around  $5 \times 10^6$   
655 cells/ml. Cultures were diluted to  $5 \times 10^4$  cells/ml to grow another 20-24 hours as the third time  
656 point. At each timepoint,  $5 \times 10^4$  cells of each mixed culture were transferred to single wells of a  
657 96 well plate with U-shaped bottom for flow cytometry. A BD LSRFortessa FACS machine  
658 equipped with High Throughput Sampler was used to collect 30000 cells to quantify the ratio of  
659 the sample and the reference strain. The FACS data was analyzed using the FlowJo10.4.1 software.  
660 In addition to being mixed with sample strains, the reference strain was cultured separately to  
661 estimate the number of generations in an experiment. Each experiment was conducted in technical  
662 triplicates, and the fitness of each sample strain was measured in three independent experiments.

663

664 To calculate relative fitness,  $w$ , of each sample strain to the reference strain, we followed  
665 this formula:  $w = 1 + s$ ,

666  $s$  is selection coefficient:  $s = \frac{\ln\left(\frac{\text{Sample}}{\text{Reference}}\right)_g - \ln\left(\frac{\text{Sample}}{\text{Reference}}\right)_0}{g}$ ,

667 in which  $g$  is the number of generations and  $\frac{\text{Sample}}{\text{Reference}}$  is the ratio between a sample strain and a  
668 reference strain (Desai et al., 2007).

669

### 670 **Chromatin Immunoprecipitation and qPCR**

671 We followed the protocol of calibrated chromatin immunoprecipitation (Makrantonis et  
672 al., 2019) to precipitate chromosome-bound kleisins. First, cell quantities were measured by  
673 multiplying culture volumes by optical density at 600 nm ( $OD_{600}$ ) and this product is referred to  
674 as O.D. units. 20 O.D. of *S. cerevisiae* cells were crosslinked with 1% formaldehyde for 30minutes  
675 at 25°C. Each *S. cerevisiae* cell pellet was mixed with 15 O.D. of crosslinked *Schizosaccharomyces*



676 *pombe* cells that expressed an epitope tagged version of the Scc1 homolog (*RAD21-HA*). The  
677 inclusion of the fission yeast cells served as control to normalize technical variations between  
678 samples. This mixture was resuspended in ChIP lysis buffer A (50mM HEPES-KOH at pH7.5,  
679 0.1M NaCl, 1mM EDTA, 150mM NaCl, 1% TritonX-100, 0.1% Sodium Deoxycholate, 1x  
680 protease inhibitor (Roche) and further lysed by bead beating (BioSpec Products) with 0.5mm glass  
681 beads (Biospec Products). To shear chromatin, a Covaris S220 instrument was used with the  
682 following program: peak incident power:175, duty factor: 10%, cycle per burst: 200, treatment  
683 time: 250. After shearing, the cell lysate was centrifuged at 16000g at 4°C for 20 minutes to collect  
684 the supernatant containing protein-bound, sheared chromatin. To pull down the fraction of  
685 chromatin bound by kleisin, 15  $\mu$ l pre-washed dynabeads ProteinG (Invitrogen) and 7.5 $\mu$ l anti-HA  
686 antibody (12CA5, Invitrogen) were added in 1ml lysate and incubated at 4°C overnight. After  
687 immunoprecipitation, the beads were washed with ChIP wash buffer I (50mM HEPES-KOH at  
688 pH7.5, 0.1M NaCl, 1mM EDTA, 274mM NaCl, 1% TritonX-100, 0.1% Sodium Deoxycholate),  
689 ChIP wash buffer II (50mM HEPES-KOH at pH7.5, 0.1M NaCl, 1mM EDTA, 500mM NaCl, 1%  
690 TritonX-100, 0.1% Sodium Deoxycholate), ChIP wash buffer III (10mM Tris/HCl pH8.0, 0.25M  
691 LiCl, 1mM EDTA, 0.5% NP40, 0.5% Sodium Deoxycholate), and TE (10mM Tris/HCl pH8.0,  
692 1mM EDTA).

693  
694 To process the sample for quantitative PCR, immunoprecipitated chromatin and a 1:100  
695 dilution of the input chromatin were separately recovered by boiling with a 10% Chelex-100 resin  
696 (BioRad) before treating with 25  $\mu$ g/ml Proteinase K at 55 °C for 30 minutes. Samples were boiled  
697 again to inactivate Proteinase K, centrifuged and the supernatant was subjected to qPCR on ABI  
698 7900 using PerfeCTa SYBR Green FastMix ROX (Quanta BioSciences). The sequences of primers  
699 used for qPCR are listed in Table S3. To calculate the enrichment of pull-down DNA in total input  
700 chromatin,

701 We used the following formula:  $\frac{ChIP}{input} = E^{-\Delta Ct}$ ,

702  $\Delta Ct = Ct_{ChIP} - (Ct_{input} - \log_E(dilution\ factor))$ , in which  $E$  is primer efficiency and  
703  $dilution\ factor$  is 100. Enriched % of input is  $100 \times \frac{ChIP}{input}$ . At each cohesin binding site, the  
704 final enriched % of input is calibrated to the enriched % of input at a peri-centromeric site of the  
705 *S. pombe* genome.

706  
707 For ChIP-Seq, chromatin was immunoprecipitated as described above, and purified  
708 chromatin was subjected to DNA end repair and dA tailing to make sequencing library as described  
709 (Makrantonis et al., 2019). Samples were sequenced on a MiniSeq with 75 base paired-end reads  
710 (Illumina, San Diego, CA). Scripts and workflows used to create ChIP-Seq are stored on the github  
711 repository (<https://github.com/PhoebeHsieh-yuying>).

### 712 713 **Cell cycle progression by flowcytometry**

714 Yeast strains with *P<sub>GALI</sub>-SCC1* were grown in YEP containing 2% Galactose to log phase.  
715 To synchronize populations in G1, cells were washed and diluted in YEP containing 2% Raffinose  
716 and 100  $\mu$ g/ml alpha-factor for 2 hours. G1 synchronization was confirmed by checking that the  
717 percentage of cells that had formed mating projections (shmoo) was over 90% using a light  
718 microscope (MICROPHOT-SA, Nikon). To restart the cell cycle without *SCC1* transcription, cells  
719 were washed with YEP containing 50  $\mu$ g/ml Pronase (Sigma-Aldrich) twice and resuspended in  
720 YPD containing 50  $\mu$ g/ml Pronase at 30°C. 1ml of cells were collected and fixed by 70% Ethanol

721 at G1 and several timepoints after growth in YPD according to the figure legend of each  
722 experiment. Subsequently, fixed samples were treated with 0.4mg/ml RNase A (Sigma-Aldrich)  
723 at 37°C overnight, followed by 1mg/ml Proteinase K (Sigma-Aldrich) treatment at 50°C for 1 hour.  
724 DNA was stained with 1µM Sytox Green solution (Invitrogen). Prior to flow cytometry, the stained  
725 cells were sonicated for 30 seconds with 70% intensity by BRANSON Ultrasonics Sonifier S-250.  
726 A total of 10,000 cells were collected using a BD LSRFortessa FACS machine (Becton Dickinson).  
727 The FACS data was analyzed using FlowJo10.4.1. To quantify the fraction of replicating cells in  
728 the population at 30 minutes after release from the G1 block, the Watson (Pragmatic) model built  
729 in the cell cycle analysis tools of FlowJo was used to calculate the portion of cells that had  
730 completed replication (G2 peak), were undergoing genome replication (S phase), and were still in  
731 G1.

732  
733

### 734 **Sister chromosome cohesion assay and Microscopy**

735 Strains with *tetO<sub>112</sub>* array integrated at the *URA3* locus and *tetR-GFP* were used for  
736 assaying cohesion between sister chromatids (Uhlmann and Nasmyth, 1998). To examine sister  
737 chromosome cohesion in one cell cycle, sample preparation followed the same procedure as the  
738 cell cycle progression experiment excepts that cells were released from their G1 arrest into YPD  
739 containing 30µg/ml benomyl to arrest them once they reached mitosis. At each time point, cells  
740 were fixed in 4% paraformaldehyde for 15 minutes, washed, and stored in a storage solution (1.2M  
741 Sorbitol, 0.1M KH<sub>2</sub>PO<sub>4</sub>/K<sub>2</sub>HPO<sub>4</sub>) at 4°C. Images were taken with a 100x objective on a Nikon  
742 inverted Ti-E microscope with a Yokagawa spinning disc unit and an EM-CCD camera  
743 (Hamamatsu ImagEM); GFP was excited with a 488 nm laser with 25% laser power. For each  
744 image, a z-stack was taken with 41 z-steps spaced 0.5 µm apart. Images were analyzed by the Fiji  
745 distribution of ImageJ (Schindelin et al., 2012). For each experiment, at least 100 cells are analyzed.  
746 Three independent experiments were conducted for each strain.

747

### 748 **Measurement of protein abundance and protein stability**

749 The protein-containing extracts from cell pellets were prepared by NaOH lysis (Kushnirov,  
750 2000) and analyzed on Western Blots. Protein extracts were resuspended with SDS sample buffer  
751 (10mM Tris pH6.8, 2% SDS, 10% glycerol, 0.004% bromophenol blue, and 2% β-  
752 mercaptoethanol) and boiled at 100°C for 5mins. Rec8 and Scc1 were all tagged with 3xHA at the  
753 C-terminus of coding sequences and anti-HA antibody (3F10, Roche) was used to detect the  
754 abundance of kleisin proteins. The abundance of Hxk1 was monitored as a loading control using  
755 an anti-Hxk1 antibody (USBiological Life Sciences, H2035-01). SuperSignal West Dura reagent  
756 (Thermo Scientific) was used for developing chemiluminescent signal. Chemiluminescent signals  
757 were detected by an Azure Sapphire Biomolecular Imager and quantification of protein abundance  
758 was analyzed by ImageStudioLite.

759

760 To measure protein stability in mitosis, cells were arrested at metaphase in YPD containing  
761 30µg/ml Benomyl for 2 hours and treated with cycloheximide at 35 µg/ml to inhibit protein  
762 synthesis. 1ml cells were collected for to prepare samples for Western Blotting at the indicated  
763 timepoints after adding cycloheximide.

764

765

766

## 767 **Whole Genome Sequencing and Analysis**

768 Genomic DNA was prepared as described (Koschwanez et al., 2013). DNA sequencing  
769 libraries were prepared using the Illumina Nextera DNA library Prep kit as described (Baym et al.,  
770 2015). The sequencing was done on an Illumina HiSeq 2500 with 125 base paired-end reads or  
771 Illumina NovaSeq with 150 base paired-end reads. Whole genome sequencing data was processed  
772 as described (Koschwanez et al., 2013). The Burrow-Wheeler Aligner ([bio-bwa.sourceforge.net](http://bio-bwa.sourceforge.net))  
773 was used to map DNA sequences to the *S. cerevisiae* reference genome r64, downloaded from  
774 *Saccharomyces* Genome Database ([www.yeastgenome.org](http://www.yeastgenome.org)). The resulting SAM (Sequence  
775 Alignment/Map) file was converted to a BAM file, an indexed pileup format file, using the  
776 samtools software package ([samtools.sourceforge.net](http://samtools.sourceforge.net)). GATK ([www.broadinstitute.org/gatk](http://www.broadinstitute.org/gatk)) was  
777 used to realign local indels, and Varscan ([varscan.sourceforge.net](http://varscan.sourceforge.net)) was used to call variants.  
778 Mutations were identified using an in-house pipeline ([github.com/koschwanez/mutantanalysis](https://github.com/koschwanez/mutantanalysis))  
779 written in Python. Variants that differ between the ancestral and evolved genome >10%, a  
780 threshold above average sequencing error, are called as mutations, and any mutation present in  
781 >90% of sequencing reads in the evolved genome is defined as fixed mutation. In our pipeline,  
782 mutations can be found in both coding and non-coding sequences. In this study, we focused on  
783 mutations that cause non-synonymous substitution in the coding sequence. Scripts and workflows  
784 used to find evolved mutations are stored on the github repository  
785 (<https://github.com/PhoebeHsieh-yuying>).

786

## 787 **Generation of Reconstructed Strains**

788 Individual mutations from evolved strain were engineered into the targeted locus of the  
789 ancestral strain by homologous recombination. A DNA fragment containing targeted gene with  
790 the desired mutation, a selection maker (*HpHMX4* or *HIS3MX4*), and 300 bp downstream of the  
791 targeted gene was made by PCR. To measure fitness effect of an evolved mutation in the ancestor,  
792 this DNA fragment was transformed into yPH280. The presence of the desired mutation was  
793 confirmed by Sanger sequencing. To measure fitness effect of reconstructed mutations in the Rec8-  
794 expressing background, yeast cells were cultured in YPD to lose pRS416-*SCC1* and cells without  
795 *SCC1* plasmid were selected by the growth on 5-FOA plates.

796

797 To measure the effect of these reconstructed mutations on cell cycle progression and sister  
798 cohesion, the same transformation procedure was done in the *P<sub>GALI</sub>-SCC1 P<sub>SCC1</sub>-REC8* strain with  
799 GFP-labeled chromosome V and phenotypes were assayed in the presence of glucose.

800

801

## 802 **Whole Genome Replication Profile**

803 Yeast cells were arrested in G1 with 2 $\mu$ g/ml  $\alpha$ -factor and low pH as described (Rosebrock,  
804 2017) and follow the same procedure allowing cells enter cell cycle as the flowcytometry  
805 experiments. 1ml cells were collected separately for DNA content analysis and genomic DNA  
806 extraction at the following time points: 0, 10, 20, 30, 40, 50, 60 minutes after G1 arrest. Whole  
807 genome sequencing libraries were made as previously described. Sequencing was done on an  
808 Illumina NovaSeq with 150 base paired-end reads. Two separate experiments were done for each  
809 strain.

810

811 The analysis of genome replication profile was done as described (Saayman et al., 2018);  
812 (Fumasoni and Murray, 2019). Reads mapping and CNVs detection were processed as

813 (Koschwanez et al., 2013). We followed the script in (Fumasoni and Murray, 2019) to analyze  
814 change in the CNVs at multiple timepoints during S phase to generate whole genome replication  
815 profile. First, read-depth of every 100bp window is normalized to the medium read-depth of a  
816 sequenced genome to control for sequencing variation between samples. To allow intra-strain  
817 comparison at multiple timepoints, the normalized read-depth was further scaled to the medium of  
818 DNA content obtained by flow cytometry to generate relative coverage to the corresponding G1  
819 genome. The resulting coverage was then averaged across multiple 100bp windows and a  
820 polynomial data smoothing filter (Savitsky-Golay) was applied to the individual coverage profiles  
821 to filter out noise. Replication timing  $T_{rep}$  is defined as the time at which 50% of the cells in the  
822 population replicated a given region of the genome, which is equivalent to an overall relative  
823 coverage of 1.5x, since 1x corresponds to an unreplicated region and 2x to a fully replicated one.  
824 The replication timing  $T_{rep}$  was calculated by using linear interpolation between the two time points  
825 with coverage lower and higher than 1.5x to compute the time corresponding to 1.5x coverage.  
826 Final  $T_{rep}$  were then plotted relative to their window genomic coordinates. Scripts and workflows  
827 used to generate whole genome replication profiles are stored on the github repository  
828 (<https://github.com/marcofumasoni>).

829  
830  
831  
832  
833  
834  
835  
836  
837  
838  
839  
840  
841  
842  
843  
844  
845  
846  
847  
848  
849  
850  
851  
852  
853  
854

855 **Figures**

856

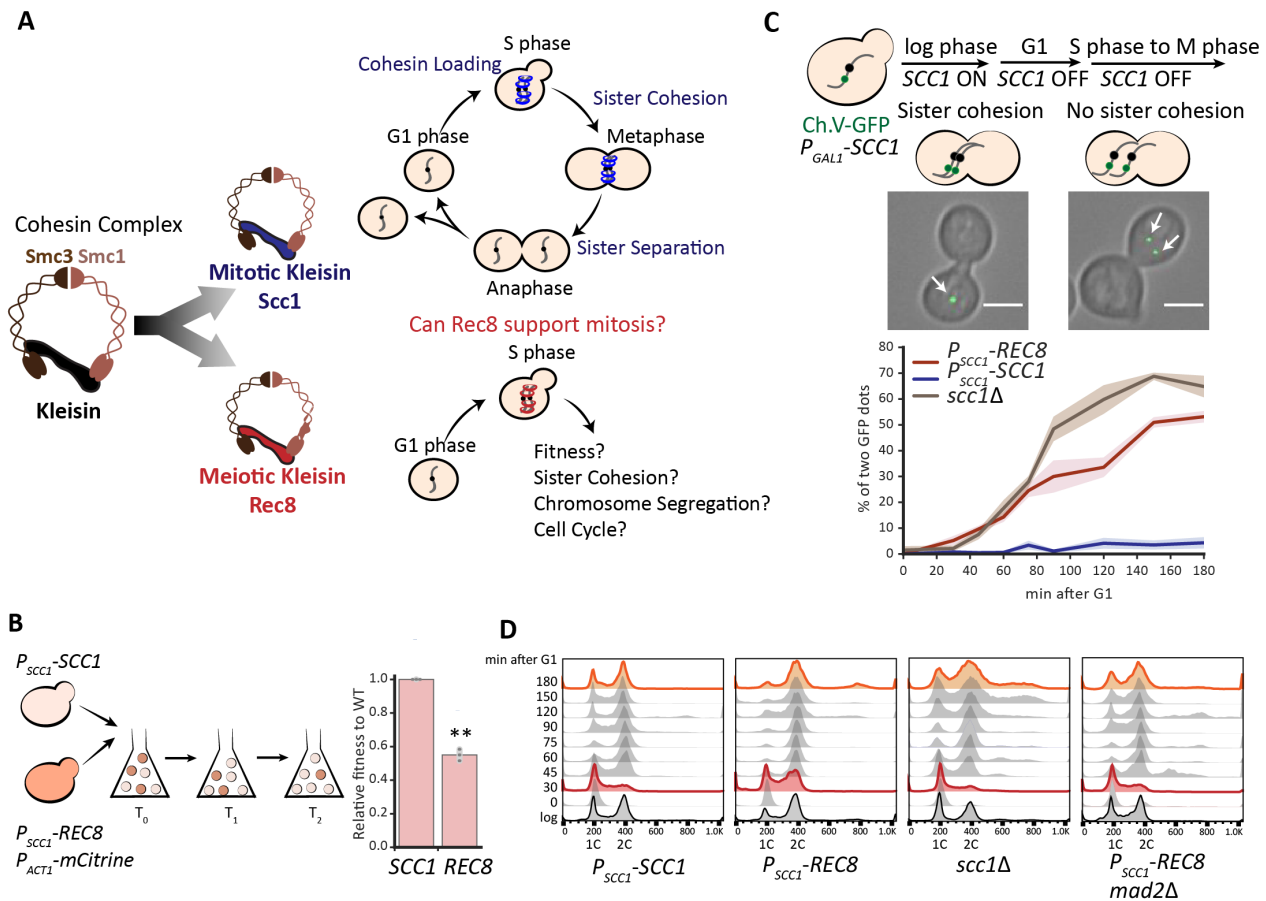

857

858

859 **Figure 1. Expressing Rec8 in place of Scc1 impairs the mitotic cell cycle and sister**

860 **chromosome cohesion**

861 (A) A diagram of the mitotic and meiotic cohesin complexes. Mitotic cohesin holds replicated

862 sister chromosomes together in mitosis. We investigated the ability of the meiotic cohesin to

863 support mitosis.

864 (B) The fitness of Rec8-expressing cells is 55% of a wild-type strain expressing Scc1. The Rec8-

865 expressing strain expressed a fluorescent marker ( $P_{ACT1}-mCitrine$ ) and was competed against the

866 wild type. The fitness of the Rec8-expressing cells relative to wild type was calculated as changes

867 in the ratio of these two strains over multiple generations. In the right panel, the darker gray points

868 represent the values of three biological replicates and the thinner gray bar represents one standard

869 deviation on each side of the mean of these measurements. (two-tailed Student  $t$  test, \*\*  $p < 0.01$ )

870 (C) The Rec8-expressing strain cannot maintain sister chromosome cohesion in mitosis. All the

871 strains ( $P_{SCC1}-REC8$ ,  $P_{SCC1}-SCC1$ , and  $scc1\Delta$ ) carried a  $P_{GAL1}-SCC1$  copy integrated in the genome

872 to allow the acute effect of altered kleisin expression to be analyzed. To examine sister

873 chromosome cohesion in a single cell cycle, Scc1 expression was switched off in G1-arrested

874 populations by transferring cells to YEP containing 2% Raffinose and alpha-factor. Cells were

875 released to YPD containing benomyl to resume cell cycle and held in mitosis. Two different

876 patterns of sister chromosome cohesion are shown: A budded cell with a single GFP dot represents

877 functional sister chromosome cohesion; a budded cell with two GFP dots represents lack of sister

878 chromosome cohesion. A single GFP dot is marked with a white arrow. At least 100 cells were  
879 imaged at each time point in each experiment. Three biological repeats were performed at each  
880 time point and for each strain; the right panel showed mean and standard deviation for the wild  
881 type (blue), Rec8-expressing (red), and *scc1* $\Delta$  (brown) strains. The scale bar is 5 $\mu$ m.  
882 **(D)** The Rec8-expressing strain progressed through S phase faster and mitosis slower. All strains  
883 were cultured as in Fig. 1C but cells were released in YPD to allow completion of the first cell  
884 cycle and entry into the second. Samples were collected at the indicated timepoints to examine  
885 DNA content by flow cytometry. Cell cycle profiles at 30 and 180 minutes are labeled in red and  
886 orange respectively.  
887

888

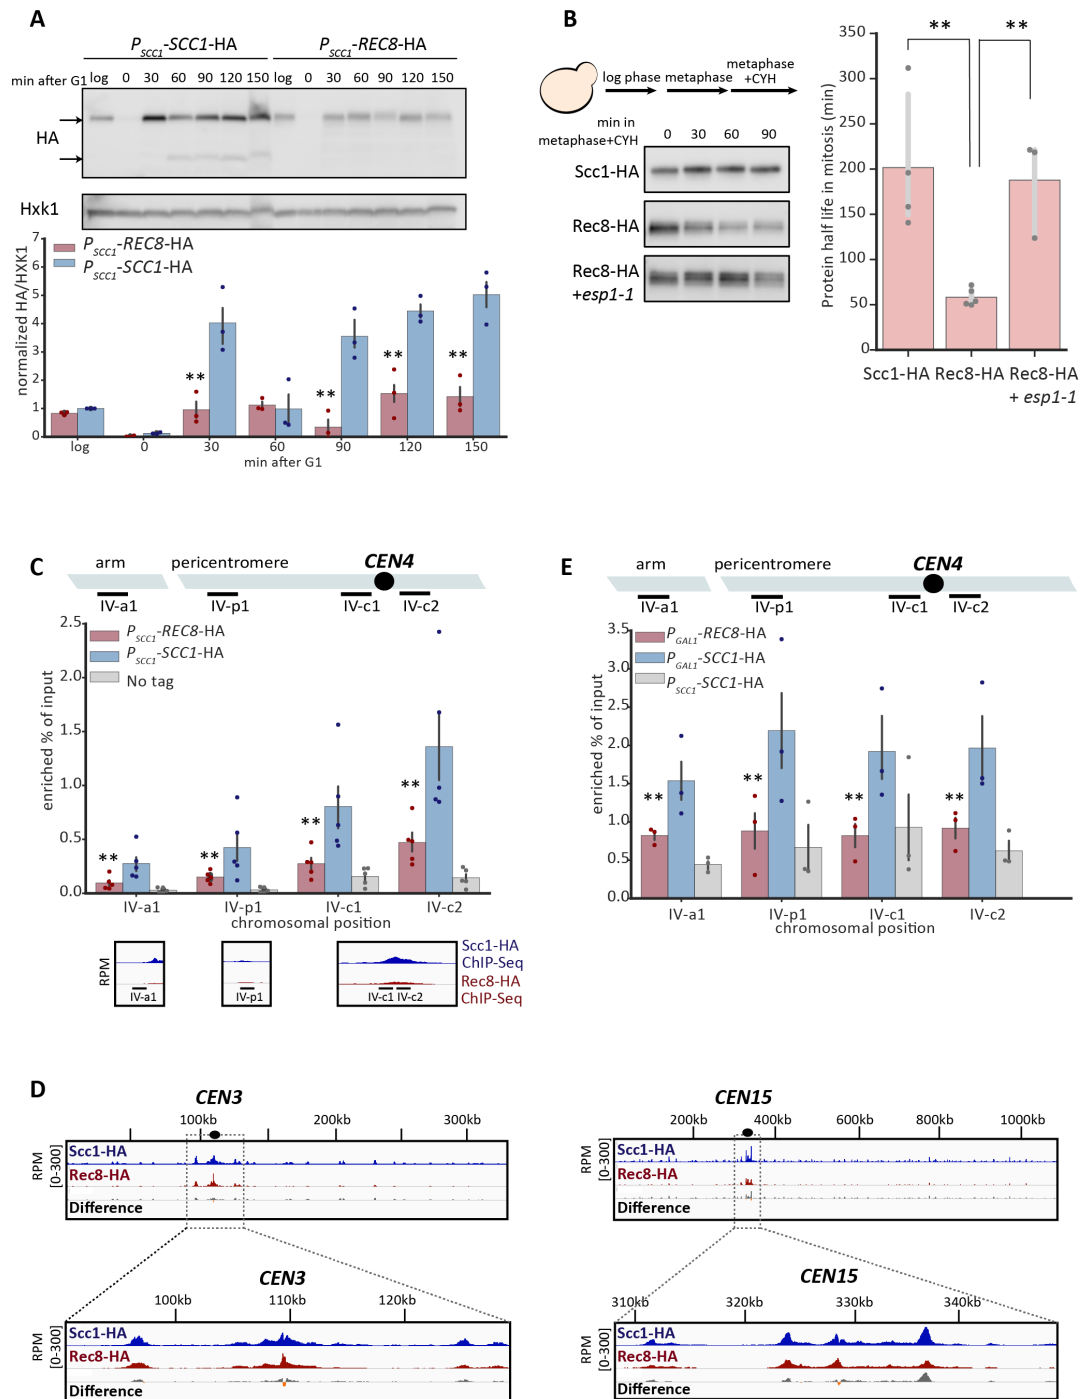

889

890

891 **Figure 2. Rec8 is unstable and shows reduced binding to mitotic chromosomes**  
 892 (A) The Rec8 protein level is lower than Scc1 in mitosis. Both *SCC1* and *REC8* were expressed  
 893 from the *SCC1* promoter and fused to a triple hemagglutinin tag (3xHA) at their C-termini in a  
 894 strain that also carried *P<sub>GALI</sub>-SCC1*. To follow kleisin protein levels in a single mitotic cycle,  
 895 expression from the *GALI* promoter was repressed and cells were released from a G1 arrest and  
 896 allowed to proceed through the cell cycle as in Fig. 1D. Cells were collected at the indicated  
 897 timepoints and cell extracts were obtained by alkaline lysis prior to analysis by Western Blotting.

898 Hxk1 was used as a loading control. In the bar graph, the upper arrow marks the size of full-length  
899 protein and the bottom arrow marks the size of cleavage product. The three colored points represent  
900 the values of three biological replicates and the dark gray bar represents one standard deviation on  
901 each side of the mean of these measurements. The statistical significance between data from the  
902 Rec8-expressing strain and wild type was calculated by two-tailed Student *t* test, \*\*  $p < 0.01$ .

903 **(B)** The instability of Rec8 in mitosis depends on separase activity. Cells were grown to log phase  
904 in YPD at 30°C and held in mitosis by addition of benomyl. To check protein stability,  
905 cycloheximide was added to the cultures to inhibit protein synthesis. Cells were collected every  
906 30 minutes to examine protein level by Western Blotting. Both Scc1 and Rec8 were detected by  
907 an anti-HA antibody. The darker gray points represent the values of three or four biological  
908 replicates and the thinner gray bar represents one standard deviation on each side of the mean of  
909 these measurements. The half-life of Rec8 is increased in cells expressing a temperature-sensitive  
910 mutant of Esp1 (*esp1-1*). (two-tailed Student *t* test, \*\*  $p < 0.01$ )

911 **(C)** The level of chromosome-bound Rec8 is lower than that of Scc1 in mitosis. Strains were  
912 released from a G1 arrest, proceeded synchronously through one cell cycle and then were arrested  
913 in mitosis in YPD containing benomyl. The chromosome-bound kleisin proteins was  
914 immunoprecipitated using an anti-HA antibody. Chromatin lysates were prepared from wild type,  
915 a Rec8-expressing strain, and a strain without HA tag as negative control. The level of  
916 chromosome bound kleisin at the known cohesin binding sites was measured by the amount of  
917 DNA that associated with the immunoprecipitated kleisin. DNA was measured by qPCR and  
918 expressed as the fraction of material compared to the total chromatin lysate (shown in the y-axis).  
919 Four genomic loci on chromosome IV are shown. The colored points represent the values of five  
920 biological replicates and the dark gray bar represents one standard deviation on each side of the  
921 mean of these measurements. The statistical significance between data from the Rec8-expressing  
922 strain and wild type was calculated by two-tailed Student *t* test, \*\*  $p < 0.01$ . The bottom panel  
923 shows the ChIP-Seq data of Scc1 and Rec8 at the corresponding cohesin binding sites, under the  
924 same conditions.

925 **(D)** ChIP-Seq analysis of Scc1- and Rec8-binding in mitosis. Sample preparation and  
926 immunoprecipitation were done as in Fig. 2C. The immunoprecipitated DNA bound by Scc1 or  
927 Rec8 were examined by whole genome sequencing. The amount of immunoprecipitated DNA is  
928 expressed as reads per million (RPM) calibrated to the reference, *S. pombe* genomic DNA  
929 immunoprecipitated by the Scc1 ortholog, Rad21. The calibrated signal of ChIP-seq data (relative  
930 to a control *S. pombe* sample) representing the degree of enrichment of kleisin (Scc1 in blue and  
931 Rec8 in red) and the difference in enrichment between the two kleisins (gray: Scc1's signal is more  
932 than Rec8's; orange: Rec8's signal is more than Scc1's) is visualized by the Integrated Genome  
933 Viewer (Robinson et al., 2011). Chromosome III and XV are shown as examples of chromosomes  
934 with different sizes and different degrees of peri-centromeric Rec8 binding, with an expanded view  
935 of 20kb DNA on each side of a centromere in the bottom panel.

936 **(E)** Rec8 loads poorly on G1 chromosomes compared to Scc1. To overexpress kleisins in G1, the  
937 *P<sub>GALI</sub>-SCC1-HA* and *P<sub>GALI</sub>-REC8-HA* strains were arrested in YEP containing 2% galactose and  
938 alpha-factor. Chromatin immunoprecipitation and qPCR were performed as described in Fig. 2B.  
939 The darker points represent the values of three biological replicates and the darker gray bar  
940 represents one standard deviation on each side of the mean of these measurements. The statistical  
941 significance between data from the Rec8-expressing strain and wild type was calculated by two-  
942 tailed Student *t* test, \*\*  $p < 0.01$ .

943



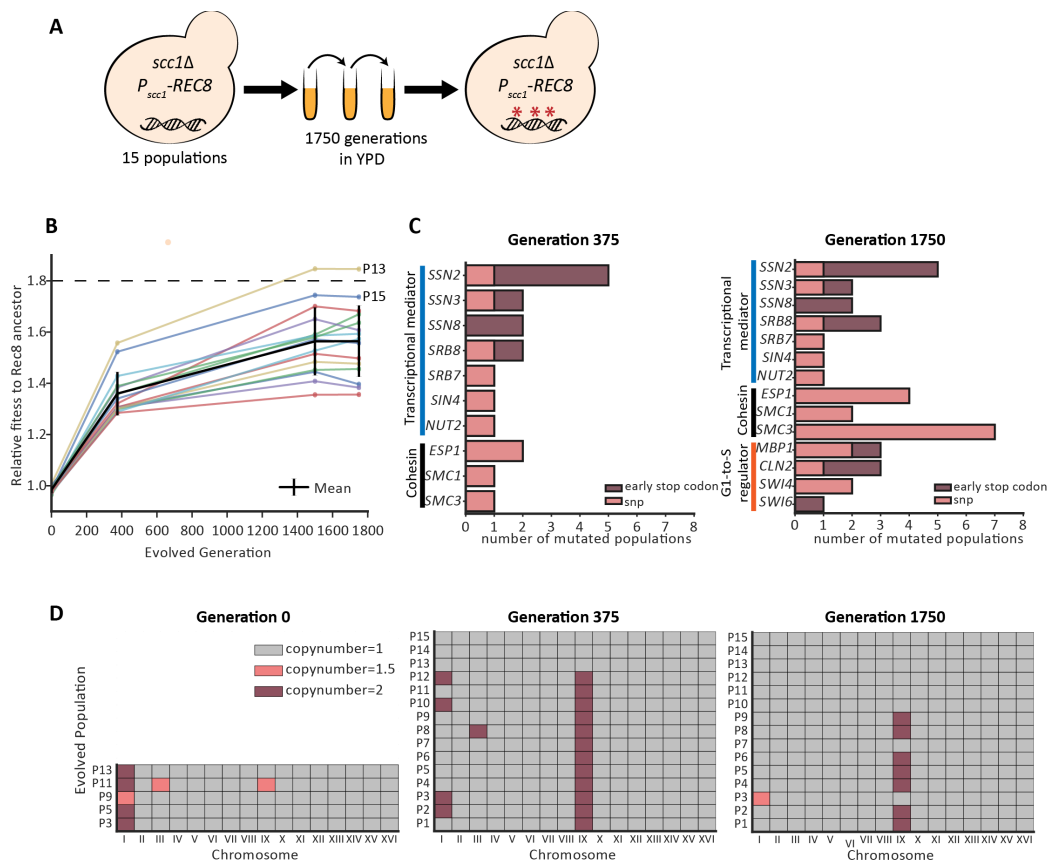

944  
 945 **Figure 3. Experimental evolution improves the fitness of Rec8-expressing populations**  
 946 (A) Schematic of the experimental evolution of fifteen independent populations forced to use Rec8  
 947 in mitosis for 1750 generations  
 948 (B) The fitness of all the evolved populations increases during evolution. The relative fitness of  
 949 each evolved population at generation 375 and generation 1750 was measured by competing them  
 950 against a fluorescently-labeled ancestor in YPD. Changes in the relative fitness of individual  
 951 evolved population during evolution is shown as individual colored line. The average fitness of all  
 952 15 evolved populations is shown as a black line. The fitness of wild type relative to the Rec8-  
 953 expressing ancestor is indicated as a black dashed line. Two evolved populations showing fitness  
 954 near wild type are labeled (P13 and P15).  
 955 (C) Summary of functional modules that had acquired fixed mutations in more than six populations  
 956 at generation 1750. The x-axis shows the number of populations that acquire a mutation in any  
 957 specified gene at generation 375 and 1750. The y-axis shows mutated genes grouped by their  
 958 functions: genes involved in the transcriptional mediator complex in blue, cohesin related genes  
 959 in black, the G1-to-S cell cycle regulators in orange. Mutations causing early stop codon are shown  
 960 in dark red and single nucleotide changes are shown in pink.  
 961 (D) Summary of changes in chromosomal copy number of all fifteen evolved populations. The  
 962 copy number of each chromosome was calculated by normalizing the read depth spanning each  
 963 chromosome to the median read depth over the entire genome. The results of five ancestral clones  
 964 and fifteen evolved populations at generation 375 and 1750 are shown here: gray marks one copy,  
 965 dark red marks two copies, and pink marks 1.5 copies, suggesting part of population were disomic.

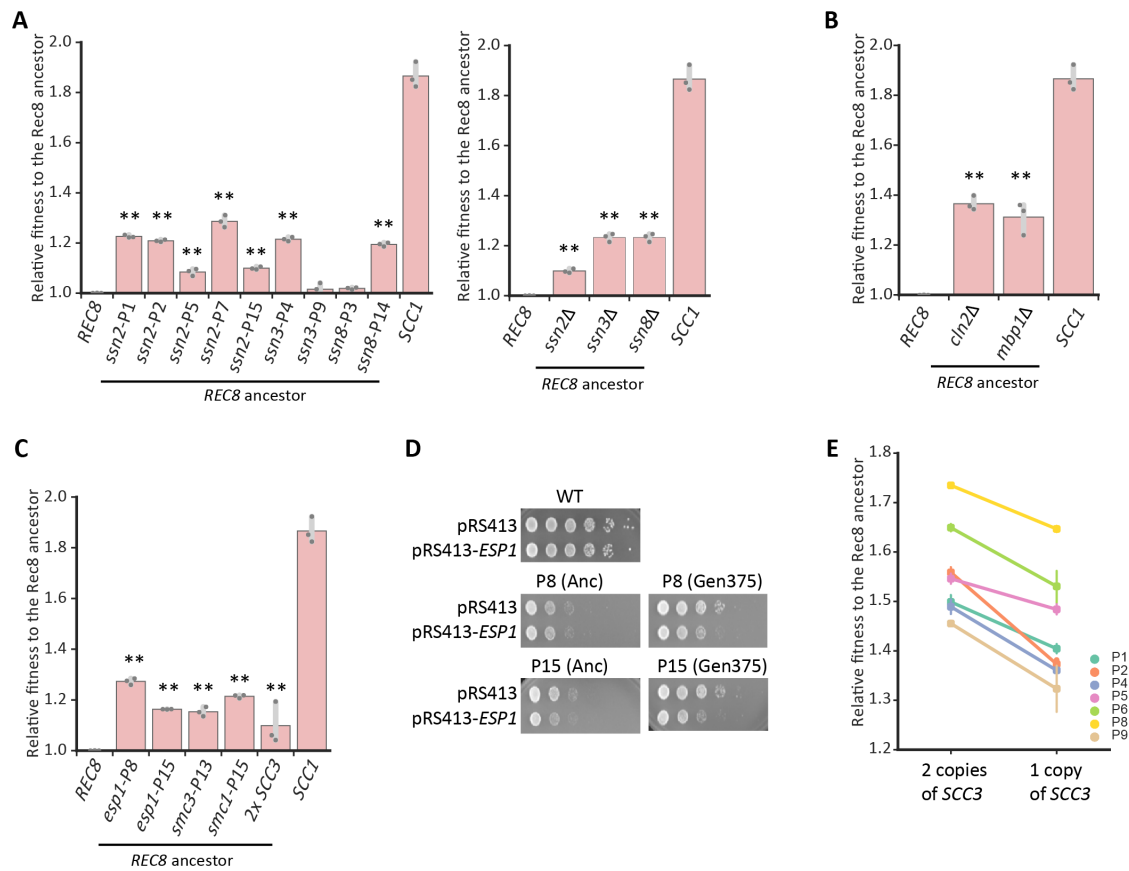

966  
967  
968  
969  
970  
971  
972  
973  
974  
975  
976  
977  
978  
979  
980  
981  
982  
983  
984  
985  
986  
987  
988

**Figure 4. Reconstructing individual evolved mutations increases the fitness of the Rec8-expressing ancestor**

(A) The effect of single evolved mutation and deletion of genes encoding subunits of the Cdk8 complex on fitness of the Rec8-expressing ancestor.

(B) The effect of deleting *CLN2* and *MBP1* on fitness of the Rec8-expressing ancestor.

(C) The effect of single evolved mutations in genes that encode other cohesin components or separase and an extra copy of *SCC3* on fitness of the Rec8-expressing ancestor. In 4A-4C, each single evolved mutation was reconstructed in the Rec8 ancestral strain used in the evolution experiment. The relative fitness of reconstructed strains to the ancestor was measured by competing it against a fluorescently-labeled Rec8 ancestor. The darker gray points represent the values of three biological replicates and the thinner gray bar represents one standard deviation on each side of the mean of these measurements. The fitness of the wild-type strain, labeled as *SCC1*, is shown in each panel. The statistical significance between data from the Rec8-expressing strain and each mutation-reconstructed strain was calculated by two-tailed Student *t* test, \*\*  $p < 0.01$ .

(D) *esp1* evolved mutations (*esp1-P8* and *esp1-P15*) are hypomorphic. A *CEN* plasmid carrying *ESP1* was transformed into a wild-type strain, two ancestors (Anc), and two evolved populations that had acquired *esp1* mutations (P8 and P15) at generation 375. Cells were subjected to ten-fold serial dilutions and spotted on YPD plates to assay growth. Cells transformed with an empty plasmid (pRS413) served as control.

(E) The effect of deleting one copy of *SCC3* of fitness of the evolved populations with disomic chromosome IX at generation 1750.

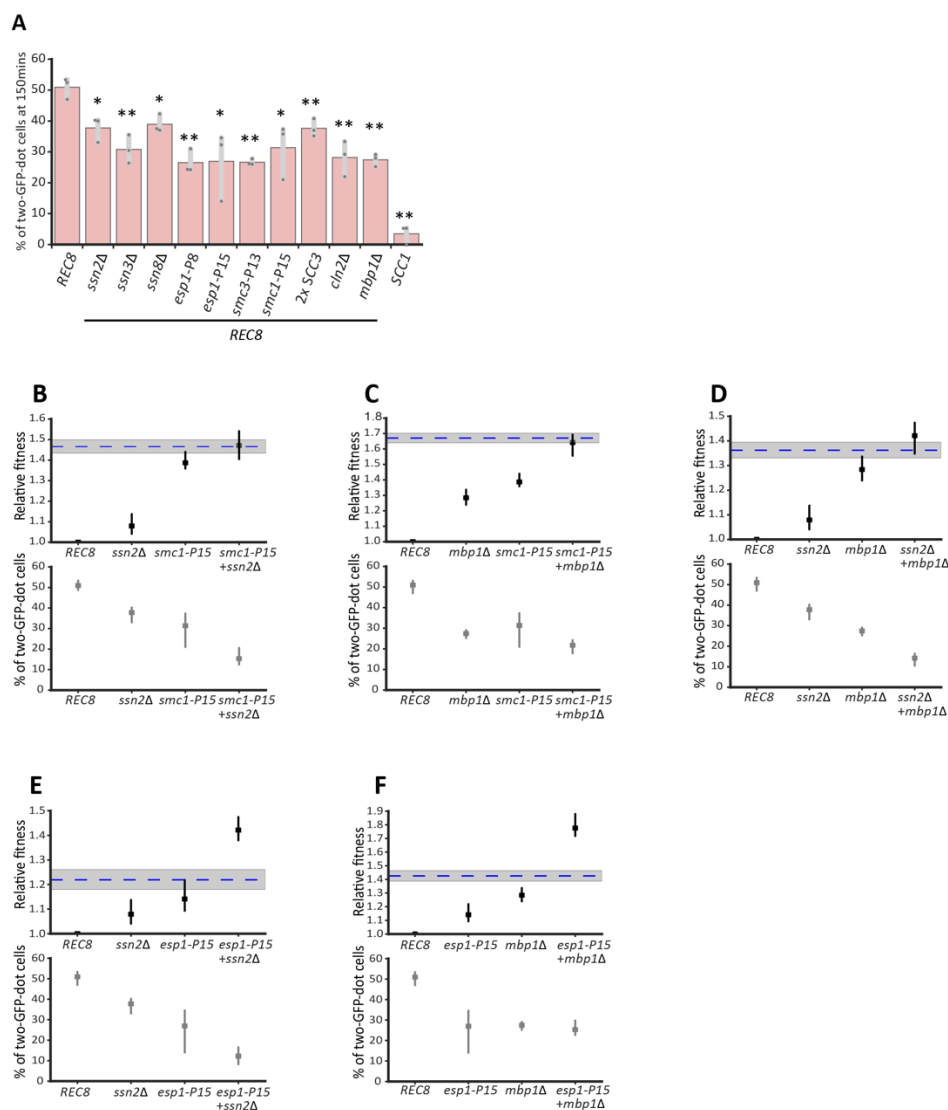

989  
990 **Figure 5. Adaptive genetic changes improve sister chromosome cohesion in Rec8-expressing**  
991 **cells**

992 **(A)** Individual adaptive genetic changes partially improve sister chromosome cohesion  
993 Deletions of genes in the Cdk8 complex, adaptive mutations in cohesin and its regulator, two  
994 copies of *SCC3*, and deletions of genes that regulate G1-to-S transition were reconstructed  
995 individually in the strain used for assaying sister cohesion. Cells were prepared as in Fig. 1C, and  
996 the percentage of cells with two GFP-dots in populations arrested in mitosis (150mins after  
997 releasing from G1) is shown. The darker gray points represent the values of three biological  
998 replicates and the thinner gray bar represents one standard deviation on each side of the mean of  
999 these measurements. The statistical significance between data from the Rec8-expressing strain and  
1000 each mutation-reconstructed strain was calculated by two-tailed Student *t* test, \*  $p < 0.05$ , \*\*  $p <$   
1001  $0.01$ .

1002 **(B-F)** Relative fitness and sister chromosome cohesion of double mutants are shown: *ssn2Δ* and  
1003 *smc1-P15* (B), *mbp1Δ* and *smc1-P15* (C), *ssn2Δ* and *mbp1Δ* (D), *ssn2Δ* and *esp1-P15* (E), *mbp1Δ*  
1004 and *esp1-P15* (F). The blue dashed line represents the expected fitness if two mutations contribute  
1005 additively, and the shaded region represents the standard error of that expectation

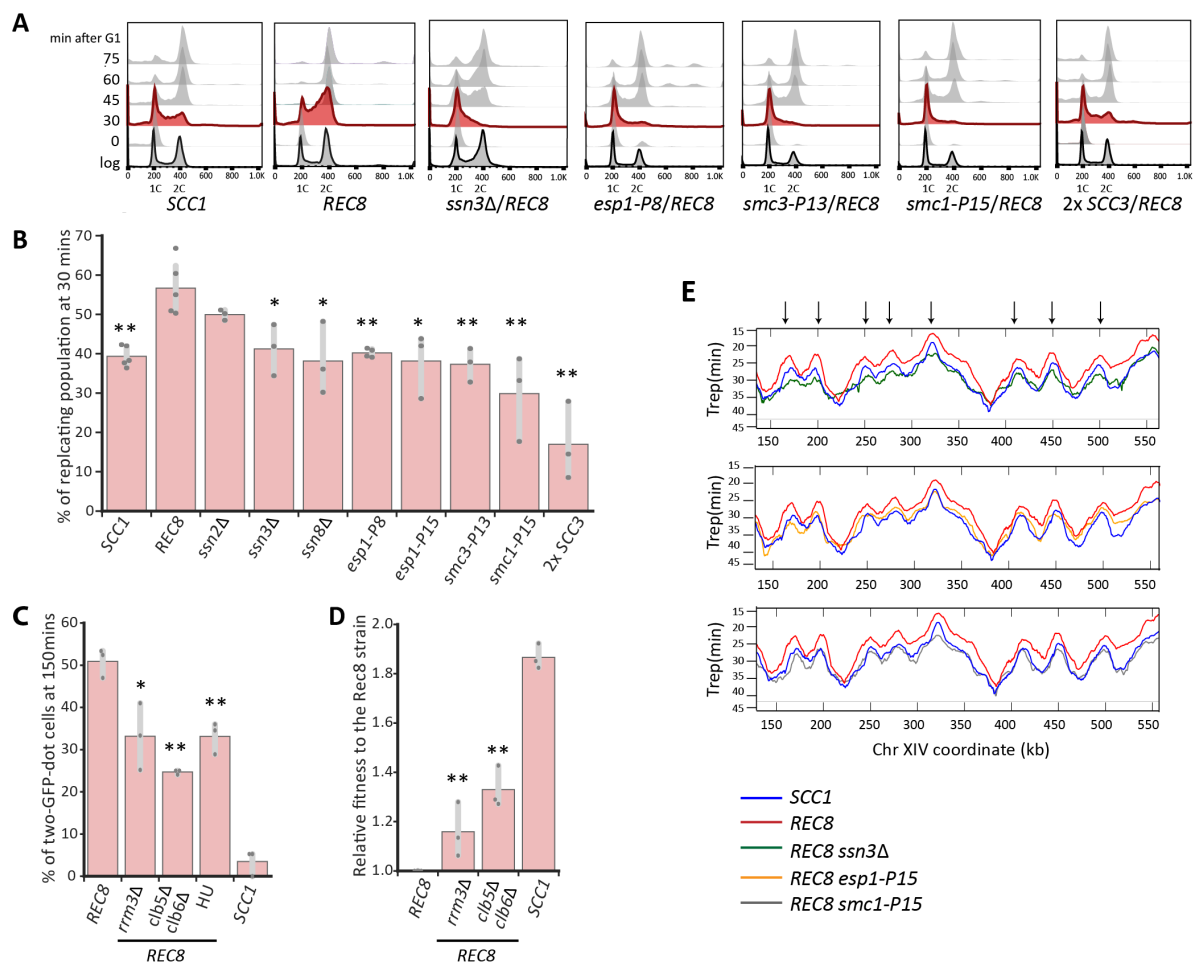

1006  
1007 **Figure 6. Slowing down genome replication partially improves sister chromosome cohesion**  
1008 **in *Rec8*-expressing cells**

1009 **(A)** Cell cycle profiles of wild type strain, the *Rec8*-expressing strain, and the *Rec8*-expressing  
1010 strains carrying a single reconstructed mutation. Cells were released from the G1 arrest as  
1011 described in Fig. 1D. Flow cytometry profiles are shown at the indicated times and profiles at 30  
1012 minutes are labeled in red.

1013 **(B)** Quantitation of the fraction of replicating cells in strains carrying a single reconstructed  
1014 mutation at 30 minutes after release from a G1 arrest. The replicating subpopulation was measured  
1015 as the fraction of the population between the G1 peak and the G2/M peak. The darker gray points  
1016 represent the values of three biological replicates and the thinner gray bar represents one standard  
1017 deviation on each side of the mean of these measurements. The statistical significance between  
1018 data from the *Rec8*-expressing strain and each mutation-reconstructed strain was calculated by  
1019 two-tailed Student *t* test, \*  $p < 0.05$ , \*\*  $p < 0.01$ .

1020 **(C)** Genetically and chemically perturbing genome replication improves sister chromosome  
1021 cohesion. The *Rec8*-expressing *rrm3Δ* and *clb5Δ clb6Δ* strains were assayed for sister  
1022 chromosome cohesion as described in Fig. 1C. 12.5mM hydroxyurea was added in YPD as *Rec8*-  
1023 expressing cells entered the cell cycle. The percentages of cells with two GFP-dot in mitotically-  
1024 arrested populations (150mins after G1) are shown. The darker gray points represent the values of  
1025 three biological replicates and the thinner gray bar represents one standard deviation on each side

1026 of the mean of these measurements. The statistical significance between data from the Rec8-  
1027 expressing strain and each mutant strain was calculated by two-tailed Student *t* test, \*  $p < 0.05$ , \*\*  
1028  $p < 0.01$ .

1029 **(D)** The effect of *rrm3Δ* and *clb5Δ clb6Δ* on the fitness of the Rec8-expressing strain. The darker  
1030 gray points represent the values of three biological replicates and the thinner gray bar represents  
1031 one standard deviation on each side of the mean of these measurements. The statistical significance  
1032 between data from the Rec8-expressing strain and each mutant strain was calculated by two-tailed  
1033 Student *t* test, \*\*  $p < 0.01$ .

1034 **(E)** The replication profiles of wild type, the Rec8-expressing strain, and the Rec8-expressing  
1035 strains with a single reconstructed mutation (*ssn3Δ*, *esp1-P15*, or *smc1-P15*). Replication  
1036 dynamics is expressed as  $T_{rep}$  (shown in the y-axis), the time at which 50% of cells in a population  
1037 complete replication at a given genomic locus. The mean replication profile of two experiments  
1038 on one part of chromosome XIV is shown. The replication profile of each strain is color-coded.  
1039 An arrowhead represents a fired replication origin. We confirmed that the different strains exited  
1040 from G1 at the same time by monitoring their budding index over time (Fig. S15).

1041  
1042  
1043  
1044  
1045  
1046

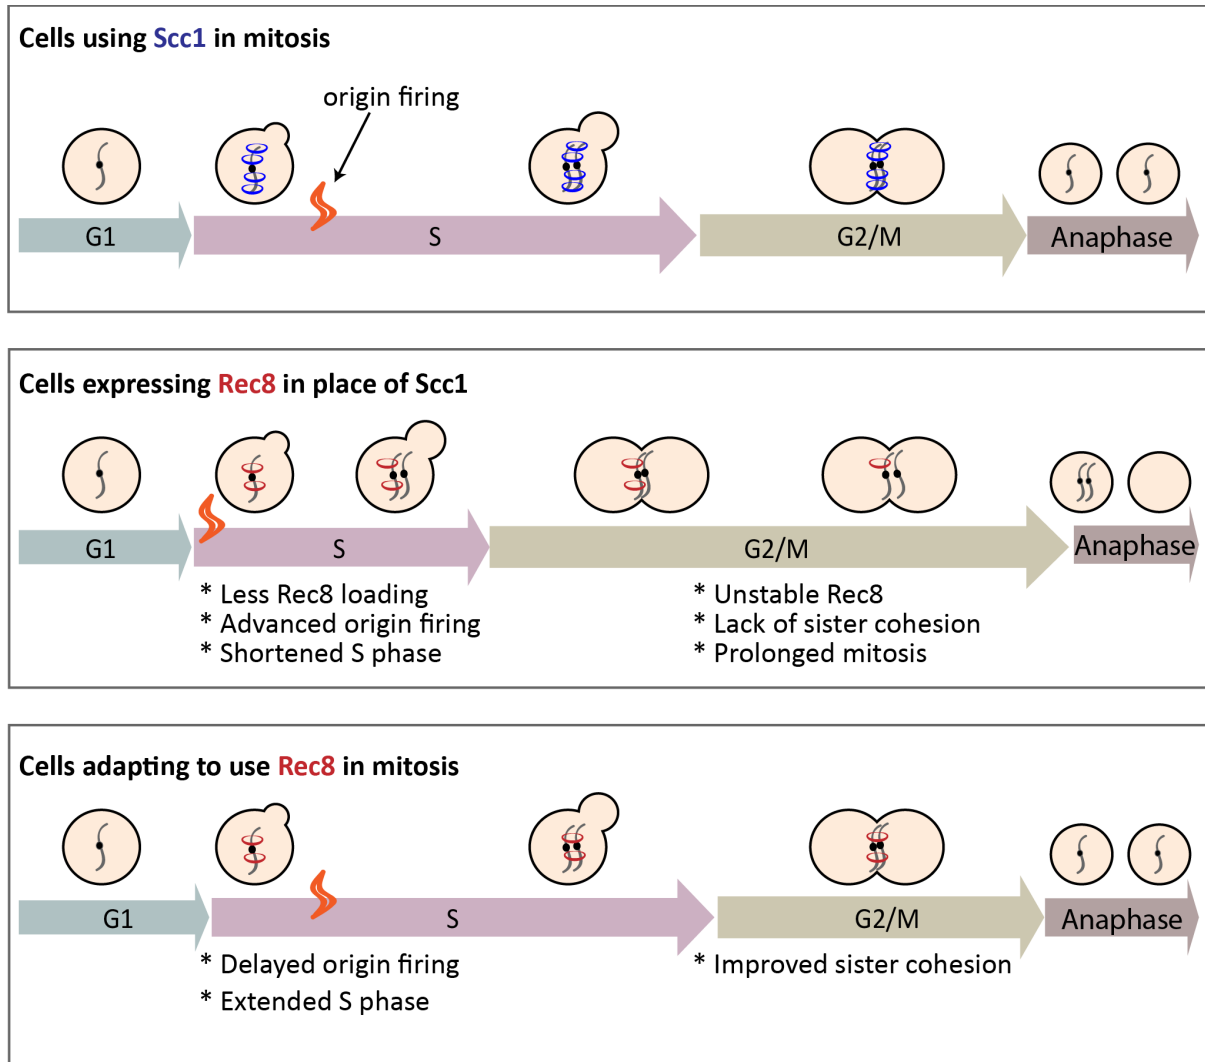

1047  
1048  
1049  
1050  
1051  
1052  
1053  
1054  
1055  
1056  
1057  
1058  
1059  
1060  
1061  
1062  
1063  
1064

**Figure 7. Summary of the mechanism that allows budding yeast to use the meiotic kleisin, *Rec8*, for mitosis**

Yeast cells expressing *Rec8* in place of *Scc1* cannot build robust cohesion to hold sister chromosomes together before anaphase due to the weak association of cohesin with chromosomes and *Rec8* protein instability. *Rec8*-expressing cells induce earlier firing of replication origins compared to wild type does and exhibits shortened S phase. After experimental evolution, adaptive mutations in different functional modules delay origin firing and improve sister chromosome cohesion of cells that are forced to use *Rec8* in mitosis, potentially by allowing more time for *Rec8*-cohesin to load onto chromosomes prior to passage of the replication fork.

1065 **Supplementary Figures**

1066

1067

**A**

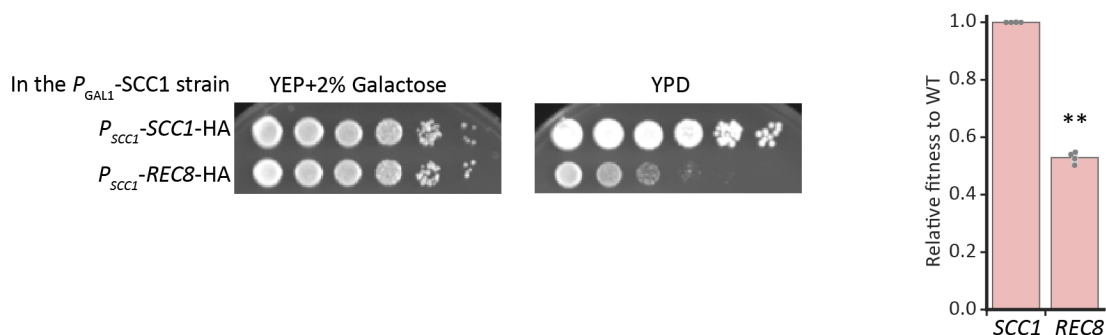

**B**

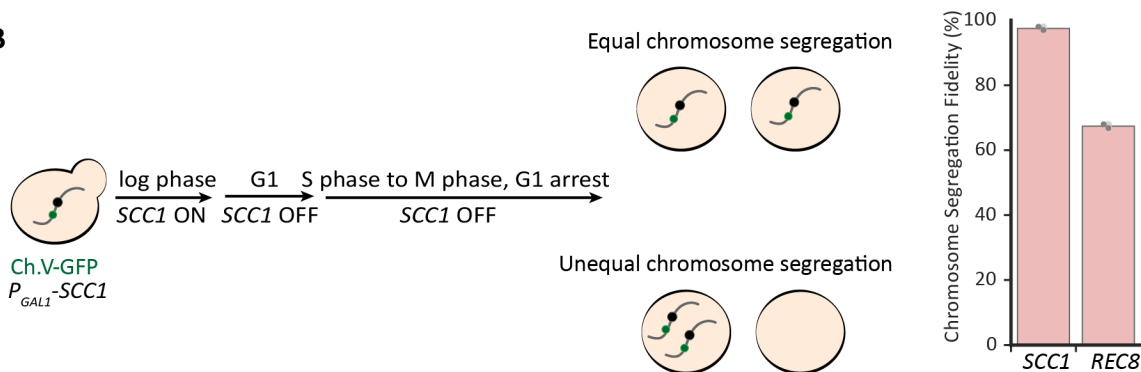

1068

1069

1070 **Figure S1. Mitotic growth and chromosome segregation of the  $P_{GALI}-SCC1 P_{SCC1}-REC8$  strain**

1071 We used a  $P_{GALI}-SCC1 P_{SCC1}-REC8$  strain to examine the effects of acutely expressing Rec8 as  
 1072 the sole kleisin. Cells were propagated in galactose-containing medium, arrested in G1, and then  
 1073 released into glucose-containing medium to repress *Sccl*.

1074 **(A)** The  $P_{SCC1}-REC8$  strain grows poorly when *SCC1* expression is turned off. Left: Cells were  
 1075 grown in YEP containing 2% galactose to the same density and serially diluted on YEP containing  
 1076 2% galactose or 2% glucose, in which the *GALI* promoter was repressed by glucose. Right:  
 1077 Relative fitness of a  $P_{GALI}-SCC1 P_{SCC1}-REC8$  strain to that of wild type in YPD. The darker gray  
 1078 points represent the values of three biological replicates and the thinner gray bar represents one  
 1079 standard deviation on each side of the mean of these measurements. (two-tailed Student *t* test, \*\*  
 1080  $p < 0.01$ )

1081 **(B)** The fidelity of chromosome segregation of the Rec8-expressing strain is 30% lower than that  
 1082 of wild type.  $P_{GALI}-SCC1 P_{SCC1}-REC8$  cells were grown in YEP containing 2% Galactose to log  
 1083 phase, transferred to YEP containing 2% raffinose and alpha-factor to repress *SCC1* expression  
 1084 and arrest them in G1, prior to release into YPD to resume cell cycle with *SCC1* expression  
 1085 repressed. Once cells had entered S phase, alpha-factor was added again to prevent cells entering  
 1086 a second cell cycle. Chromosome segregation fidelity was measured as the fraction of G1-arrested  
 1087 cells in a population showing one GFP dot, representing one copy of chromosome V, after one  
 1088 mitotic cell division. At least 100 cells were imaged in each experiment. The darker gray points  
 1089 represent the values of two biological replicates and the thinner gray bar represents one standard  
 1090 deviation on each side of the mean of these measurements.

1091

1092  
1093  
1094

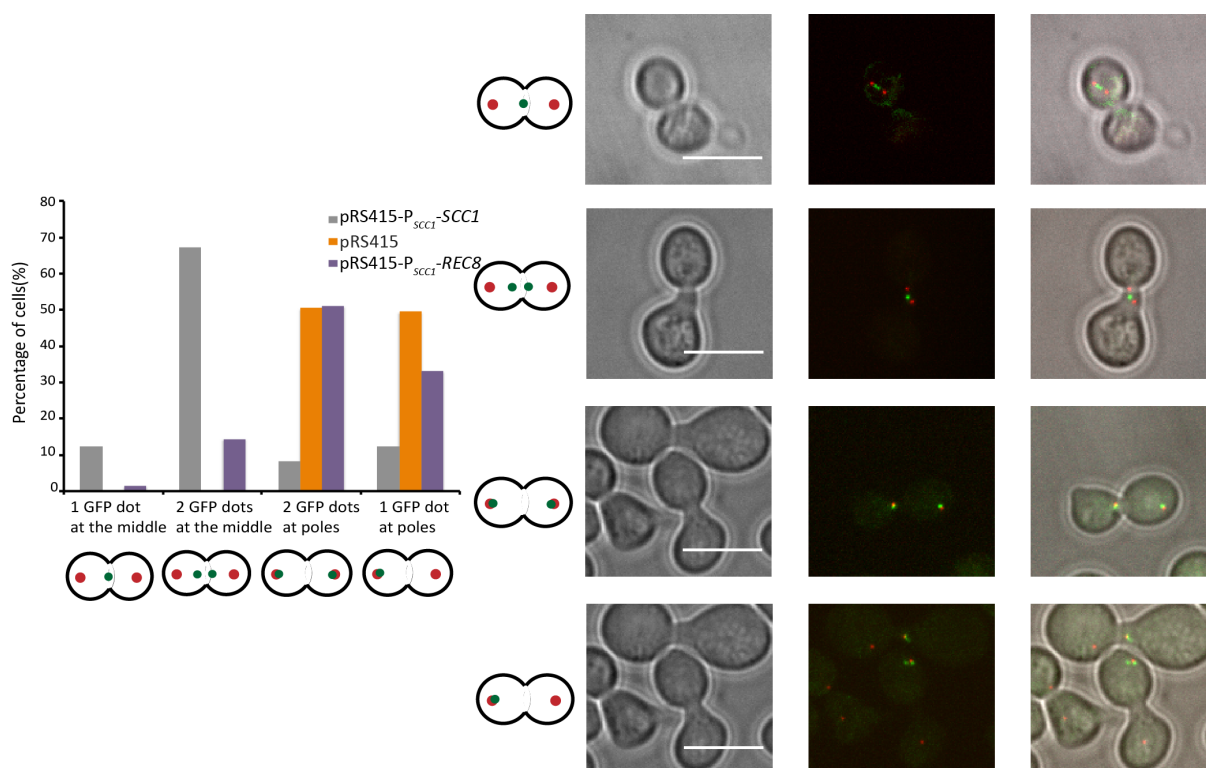

1095  
1096

1097 **Figure S2. Sister kinetochore biorientation is perturbed in *P<sub>SCC1</sub>-REC8* cells.**

1098 The yeast strain *P<sub>MET</sub>-CDC20-3xHA P<sub>GALI</sub>-SCC1-3xHA CEN15::LacO P<sub>CUP1</sub>-GFP-LacI SPC42-*  
1099 *mCherry* was transformed with a pRS415-based plasmid of *P<sub>SCC1</sub>-SCC1*, *P<sub>SCC1</sub>-REC8*, or an empty  
1100 plasmid. Cells were cultured in CSM-Met-Leu containing galactose to log phase and switched to  
1101 CSM-Met-Leu containing raffinose and alpha-factor to be synchronized in G1. Then, to repress  
1102 the *SCC1* expression and arrest cells in metaphase, cells were released into YEP containing glucose  
1103 and methionine for one cell cycle. The centromere of chromosome XV was marked by GFP and  
1104 spindle pole bodies were labeled by *SPC42-mCherry*. Cells showing one or two GFP dots in the  
1105 middle of two spindle pole bodies represent bi-oriented sister kinetochores under tension exerted  
1106 by the spindle. The lack of sister chromosome cohesion leads to sister chromosomes of  
1107 chromosome IV separating in prometaphase, resulting either in one GFP dot at each spindle pole  
1108 body or two GFP dots at one of the spindle pole bodies. At least 100 cells were imaged and  
1109 analyzed in each population. Illustrative microscopy images are shown in the right; the scale bar  
1110 is 10 $\mu$ m.

1111  
1112  
1113  
1114



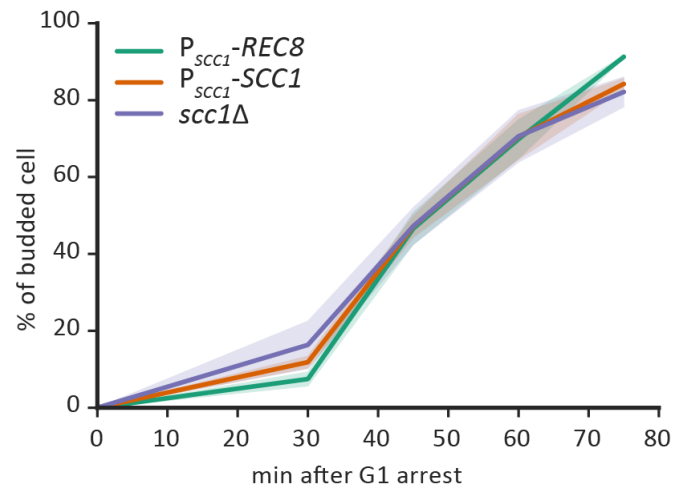

1115  
1116  
1117  
1118  
1119  
1120  
1121  
1122  
1123

**Figure S3. The budding index of the Rec8-expressing strain is similar to that of wild type and the *scc1Δ* strains.** Cells were arrested in G1 and then released as described in Fig. 1C. The y-axis shows the fraction of budded cells in a population, measured as budding index. At least 100 cells were examined at each time point for each experiment. The mean (solid line) and standard deviation (shaded region) of three biological replicates for each population are shown.

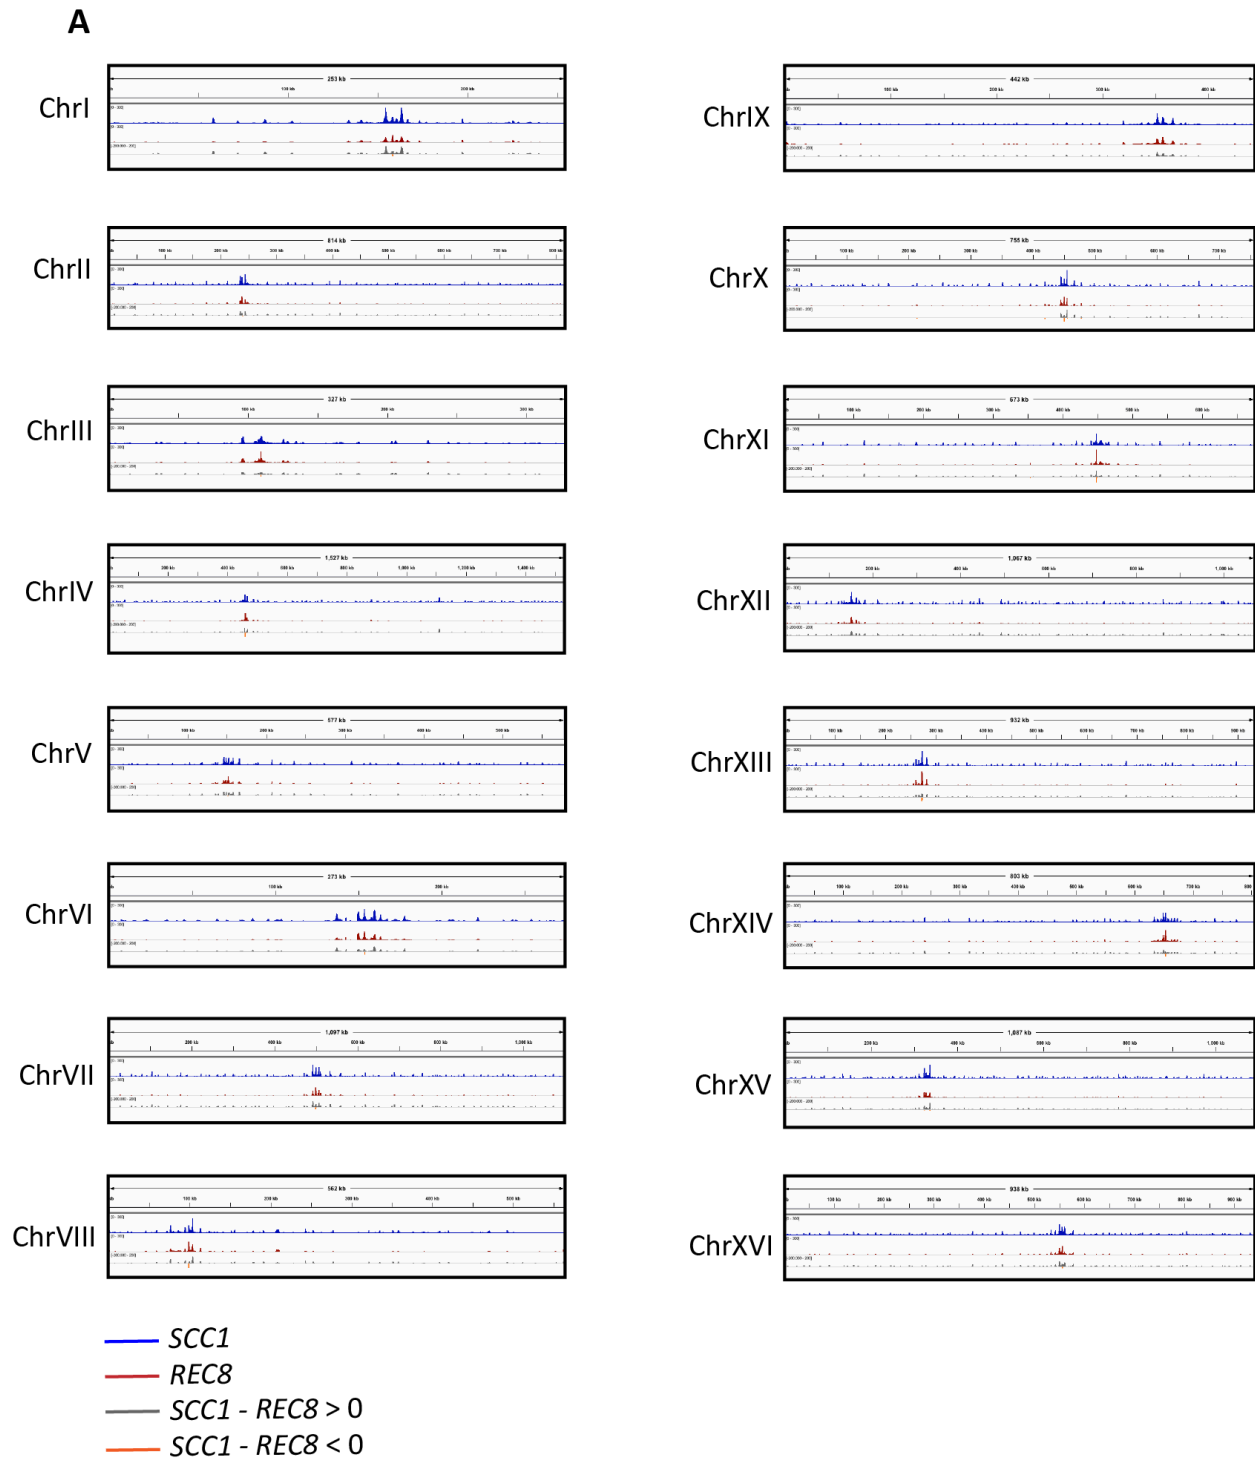

1124

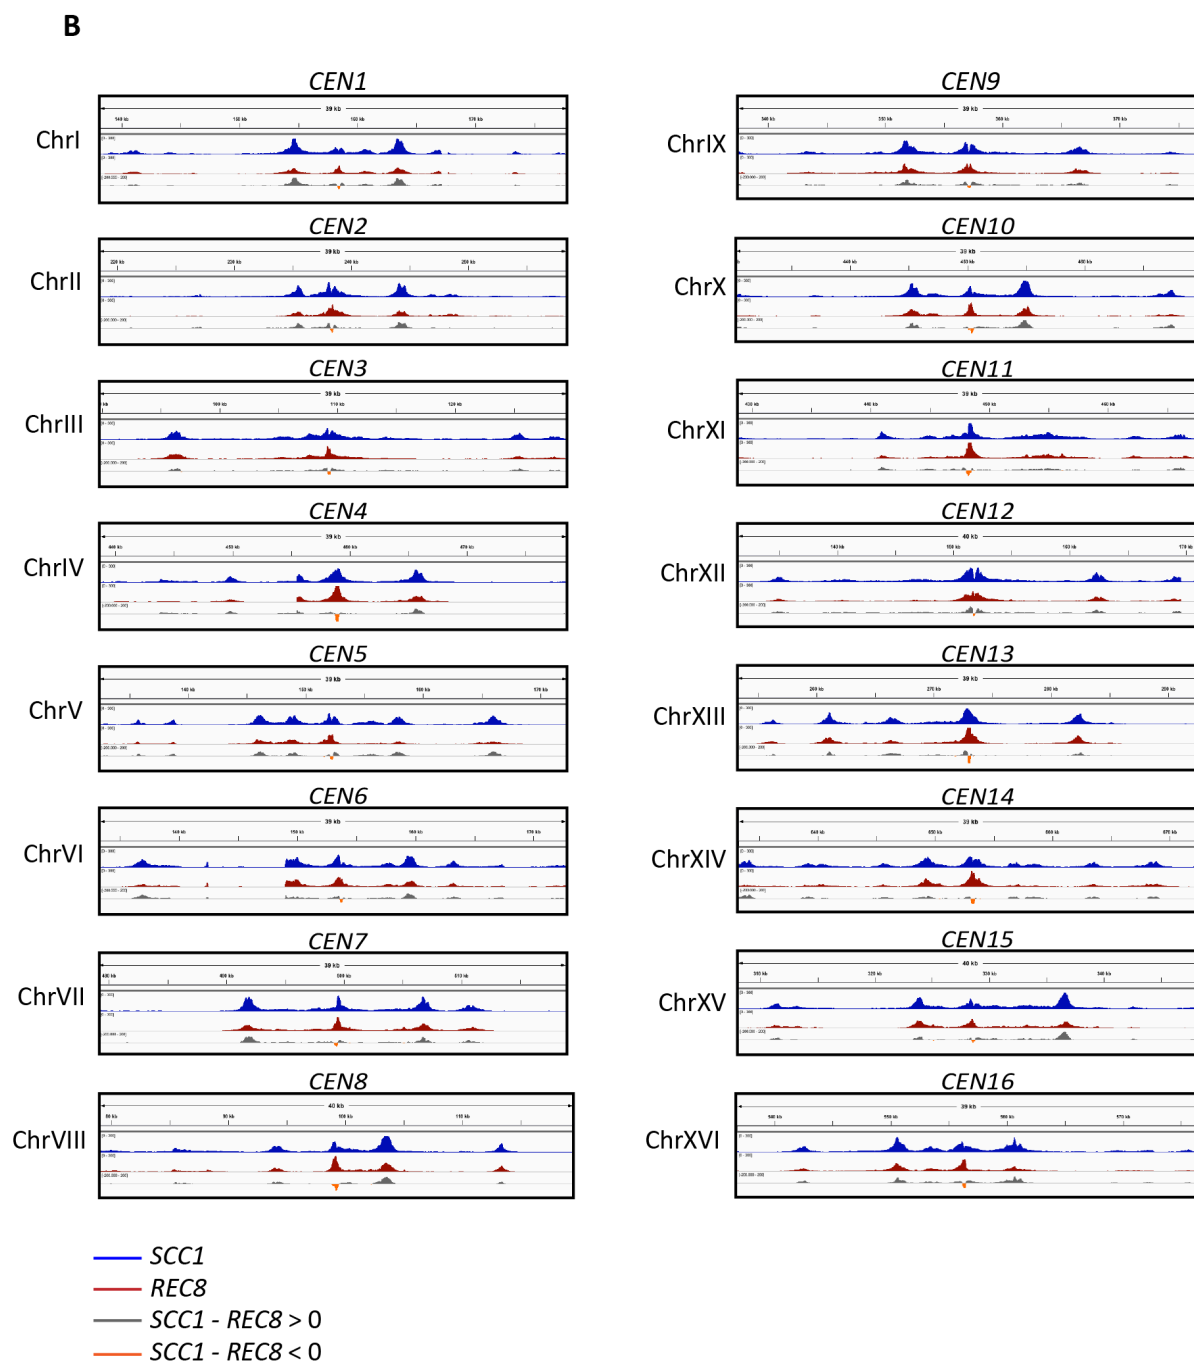

1125  
 1126 **Figure S4. The genome wide enrichment of Rec8 is lower than that of Scc1**  
 1127 The ChIP-Seq data for all 16 chromosomes (chromosomes III and XV are also shown in Fig. 2D).  
 1128 Read depths calibrated to an internal control of the *S. pombe* genome are shown on the y-axis as  
 1129 reads per million (RPM, 0-300). The enrichment of Scc1 and Rec8 is shown in blue and red  
 1130 respectively. The difference in the read depth between Scc1 and Rec8 is shown in the last track of  
 1131 each panel, in gray where Scc1's signal is higher than Rec8's and in orange where Rec8's signal  
 1132 is higher than Scc1's. (A) ChIP-Seq data of individual chromosome. (B) ChIP-Seq data of  
 1133 individual centromeres extending 20 kb on either side of the centromere. Images were prepared  
 1134 using the Integrated Genome Viewer (Robinson et al., 2011).  
 1135

1136

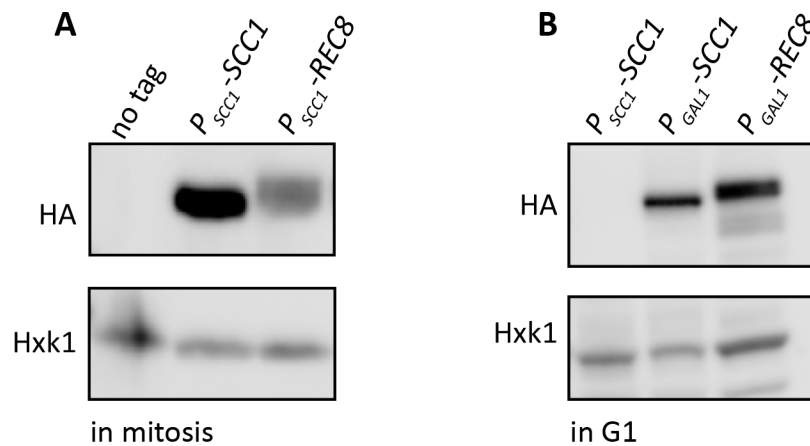

1137

1138 **Figure S5. Protein levels of Scc1 and Rec8 in cell extracts processed for ChIP experiments**

1139 (A) Protein levels of two kleisins in mitosis. Cells were processed as described in Fig. 2C and cell

1140 extracts were obtained by alkaline lysis prior to analysis by Western Blotting. Kleisin proteins

1141 were detected by anti-HA antibody and hexokinase (Hxk1) was used as a loading control.

1142 (B) Protein levels of two ectopically-expressed kleisins in G1. Cells were processed as described

1143 in Fig. 2E and cell extracts were obtained by alkaline lysis prior to analysis by Western Blotting.

1144 The  $P_{SCC1}$ - $SCC1$ -HA strain was used as a negative control because the endogenous  $SCC1$  gene is

1145 not expressed in G1. Hexokinase (Hxk1) was used as a loading control.

1146

### Generation 375

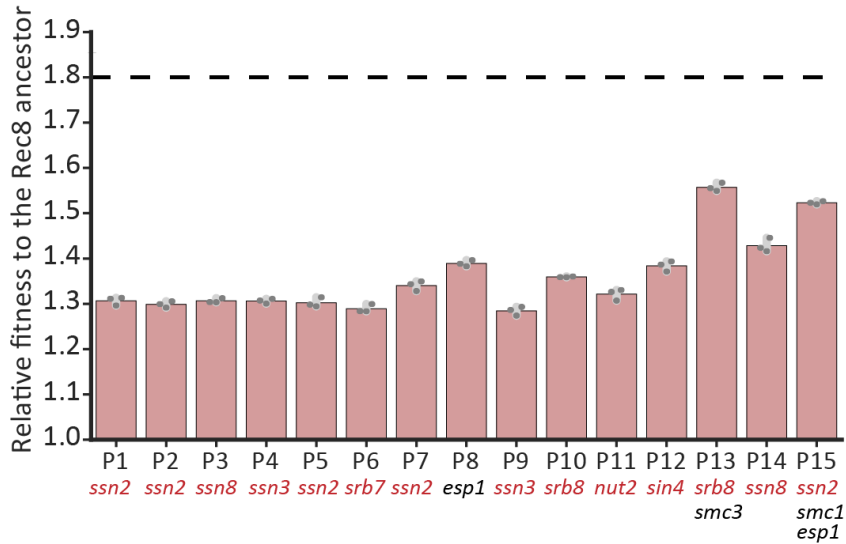

### Generation 1750

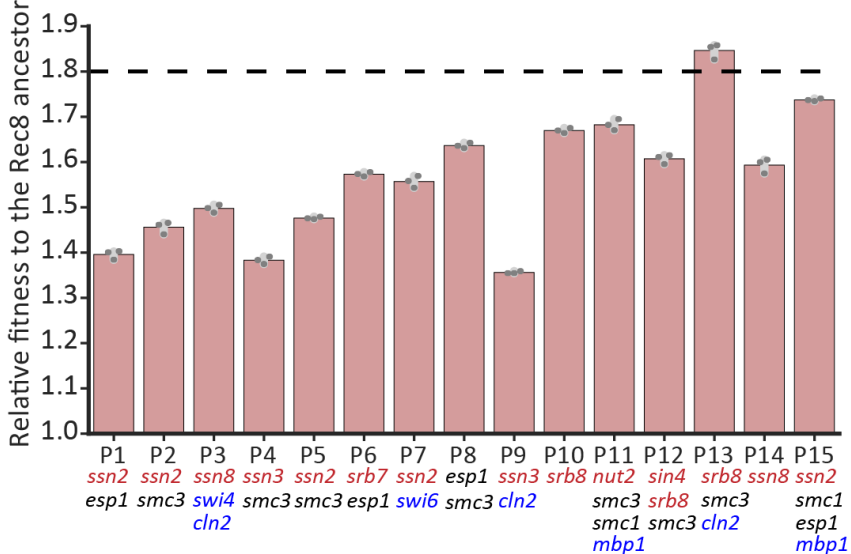

### Evolved populations and fixed adaptive mutations

1147  
1148  
1149  
1150  
1151  
1152  
1153  
1154  
1155  
1156  
1157  
1158

### Figure S6. The fitness of fifteen evolved populations relative to the Rec8-expressing ancestor at generation 375 and generation 1750.

The fitness of fifteen evolved populations at generation 375 (upper panel) and at generation 1750 (lower panel) is shown. The darker gray points represent the values of three biological replicates and the thinner gray bar represents one standard deviation on each side of the mean of these measurements. Genes in the three functional modules that mutate in at least six evolved populations at generation 1750 are shown. Mutations in the different functional modules are color-coded: transcriptional mediator complex (red), G1-to-S cell cycle regulators (blue), and cohesin and its regulators (black). The black dashed line shows the fitness of wild type relative to the Rec8-expressing ancestor.

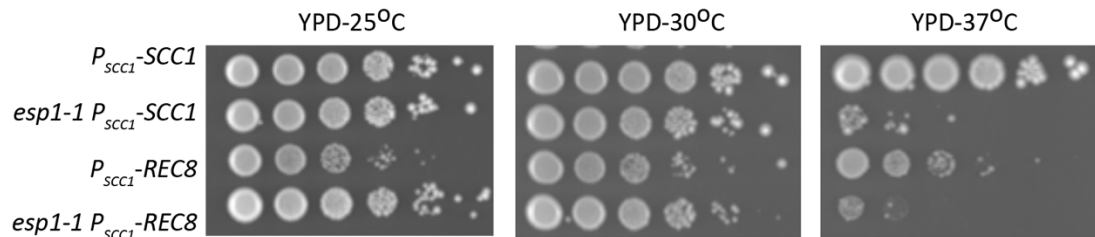

1159  
1160 **Figure S7. *esp1-1* improves the growth of the *Rec8*-expressing strain at 30°C.**  
1161 *esp1-1*, the known temperature-sensitive mutation that inactivates separase activity (Ho et al., 2015)  
1162 was introduced to the *Rec8*-expressing strain by sporulating a heterozygous diploid strain ( $P_{SCC1}$ -  
1163  $SCC1/P_{SCC1}$ - $REC8$   $ESP1/esp1-1$ ). Haploid progeny carrying four different genotypes ( $SCC1$ ,  
1164  $SCC1$   $esp1-1$ ,  $REC8$ , and  $REC8$   $esp1-1$ ) were selected. These four strains were subjected to serial  
1165 dilutions and spotted on YPD. Their growth was measured at 25°C, 30°C, and 37°C.  
1166  
1167

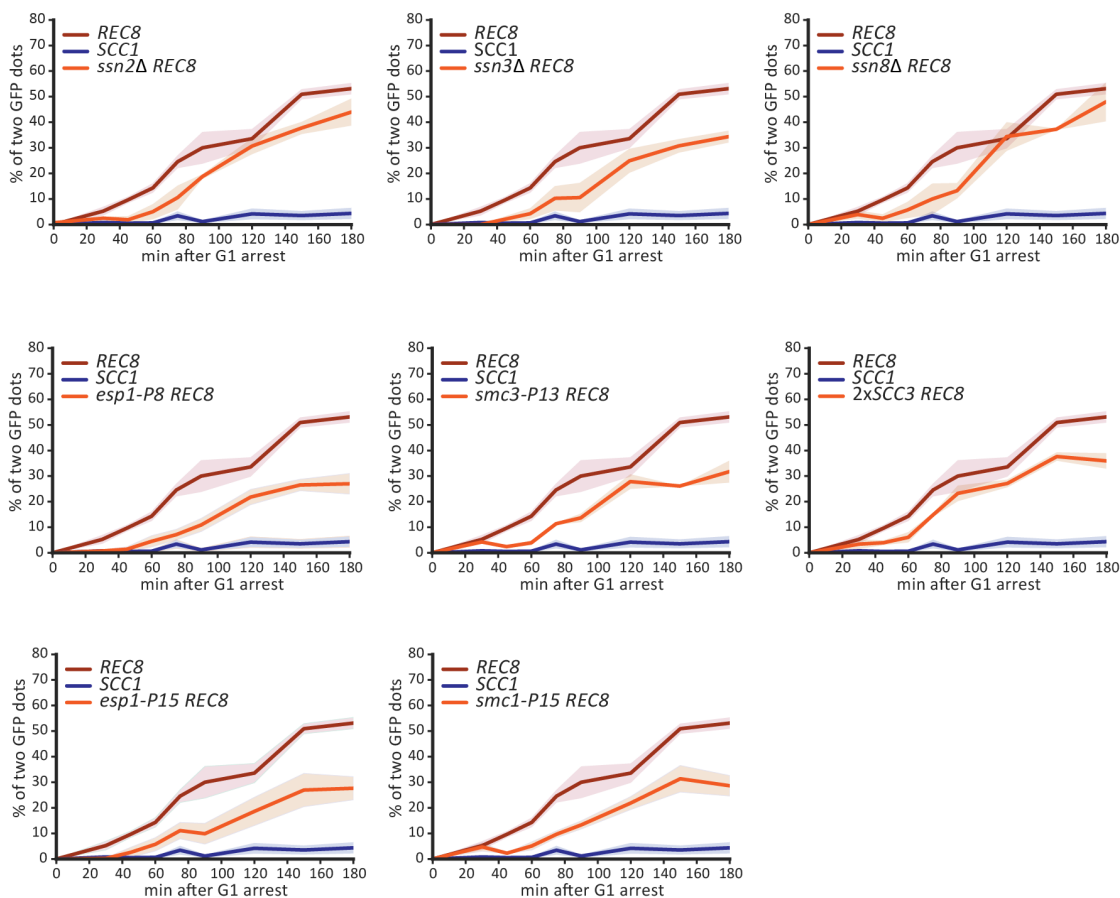

1168  
1169 **Figure S8. Individual reconstructed mutations partially improve sister cohesion.**  
1170 The time courses of sister chromosome separation for the experiment shown in Fig. 5A, which  
1171 presents the data at 150 minutes after release from the G1 arrest. At least 100 cells were imaged at  
1172 each time point for each experiment. The mean and standard deviation of three biological replicates  
1173 are shown in the solid line and shading, respectively.

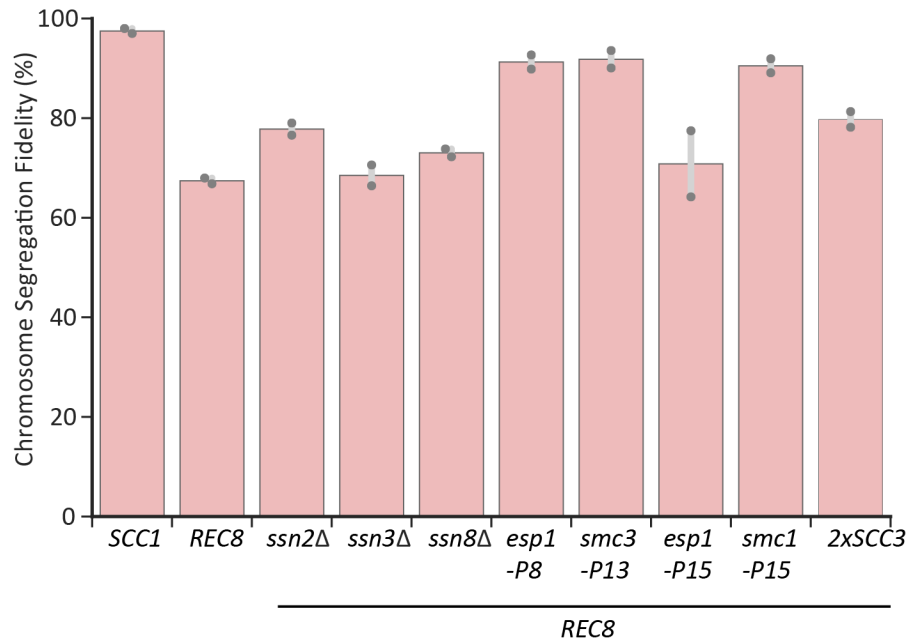

1174  
1175  
1176  
1177  
1178  
1179  
1180  
1181  
1182  
1183

**Figure S9. Individual reconstructed mutations increase chromosome segregation fidelity of the Rec8-expressing strain.** Cells were prepared as in Fig. S1B to examine the fidelity of chromosome segregation in a single mitotic cell division. Gene deletions for three components of the Cdk8 complex were used to approximate the effect of the mutations of these genes found in evolved populations. At least 100 cells were imaged in each experiment. The darker gray points represent the values of two biological replicates and the thinner gray bar represents one standard deviation on each side of the mean of these measurements.

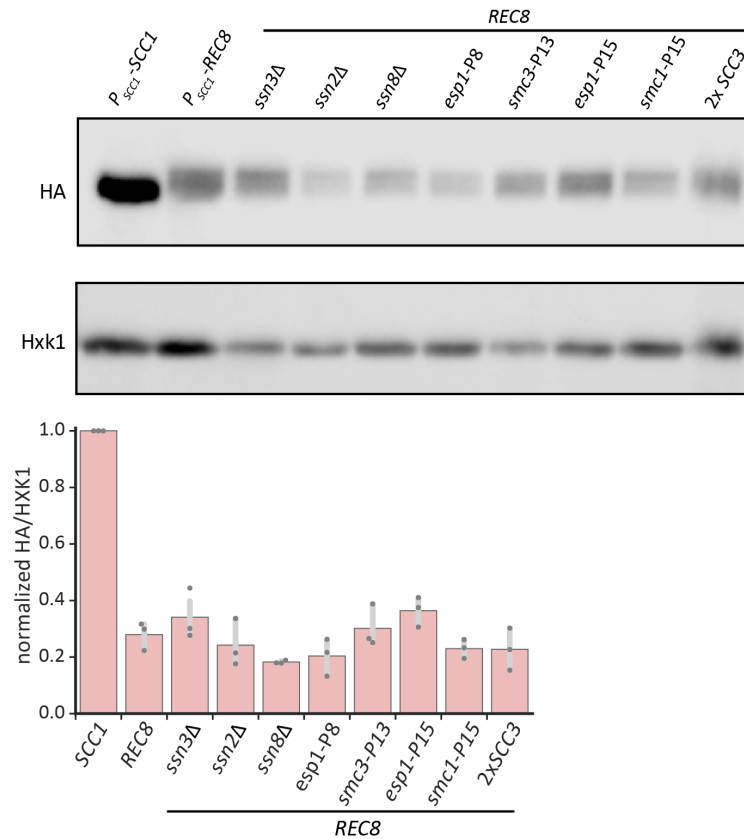

1184  
1185  
1186  
1187  
1188  
1189  
1190  
1191  
1192  
1193  
1194  
1195  
1196

**Figure S10. Individual reconstructed mutations do not alter the Rec8 protein level in mitosis.** Strains with individual reconstructed mutations were synchronized in G1, released into cell cycle, and then arrested in mitosis in YPD containing benomyl. Protein samples were collected by alkaline lysis and analyzed by Western Blotting. Both Scc1 and Rec8 were tagged with 3xHA at their C termini and anti-HA antibody was used for their detection. Hxk1 (hexokinase) was used as loading control. In the bar graph, the darker gray points represent the values of three biological replicates and the thinner gray bar represents one standard deviation on each side of the mean of these measurements.



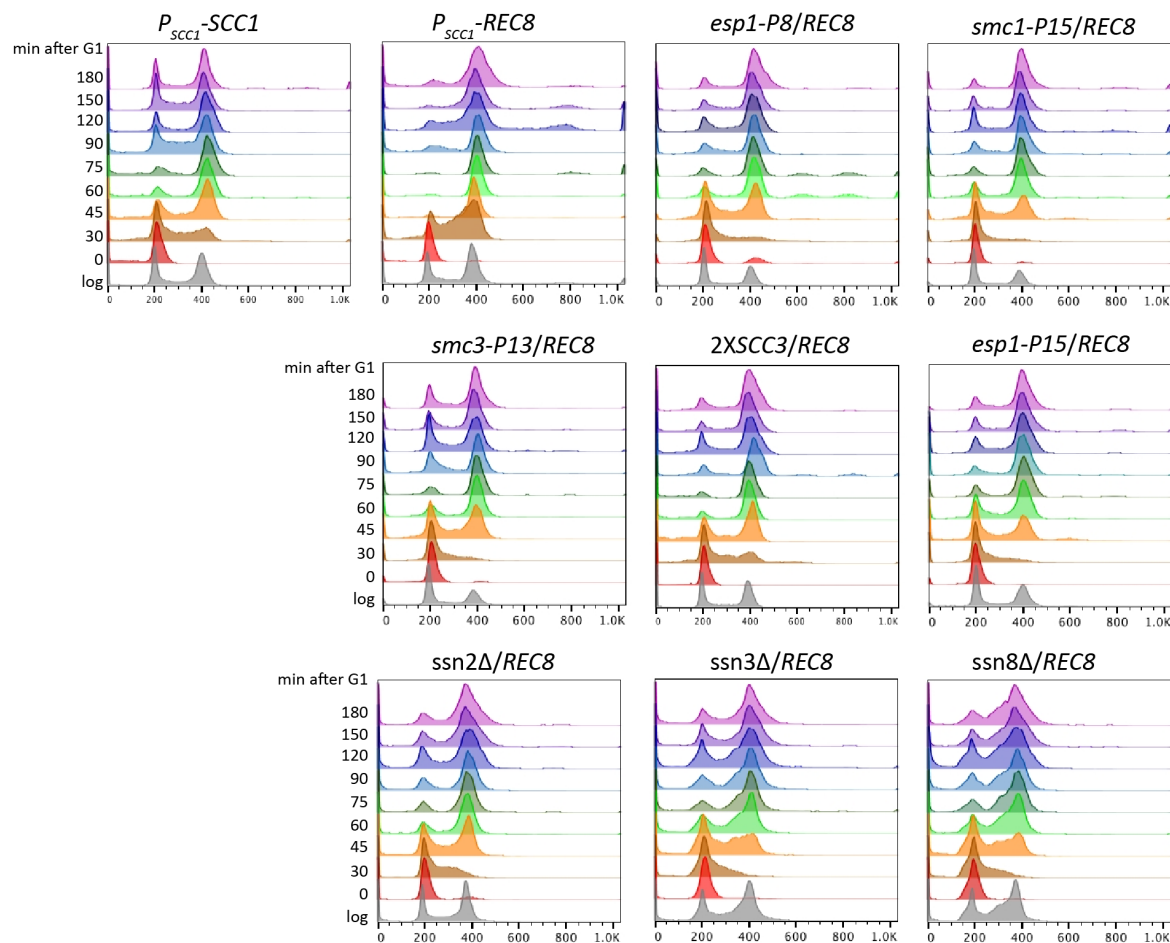

1197  
1198  
1199  
1200  
1201  
1202  
1203  
1204  
1205  
1206  
1207  
1208  
1209  
1210  
1211  
1212

**Figure S11. Individual reconstructed mutations partially restore the cycle progression profile of the Rec8-expressing strain towards that of wild type.**

The full time courses for the experiments summarized in Fig. 6A, which shows the time points from 0 to 75 minutes after release from the G1 arrest. Individual cohesin-related mutations, deletion of genes encoding the Cdk8 complex, and two integrated copies of *SCC3* were engineered separately into the *P<sub>SCC1</sub>-REC8 P<sub>GALI</sub>-SCC1* background. Cells were allowed to proceed through a synchronous cell cycle as in Fig. 1D and were collected for fixation every 15 or 30 minutes following release from a G1 arrest to analyze their DNA content.

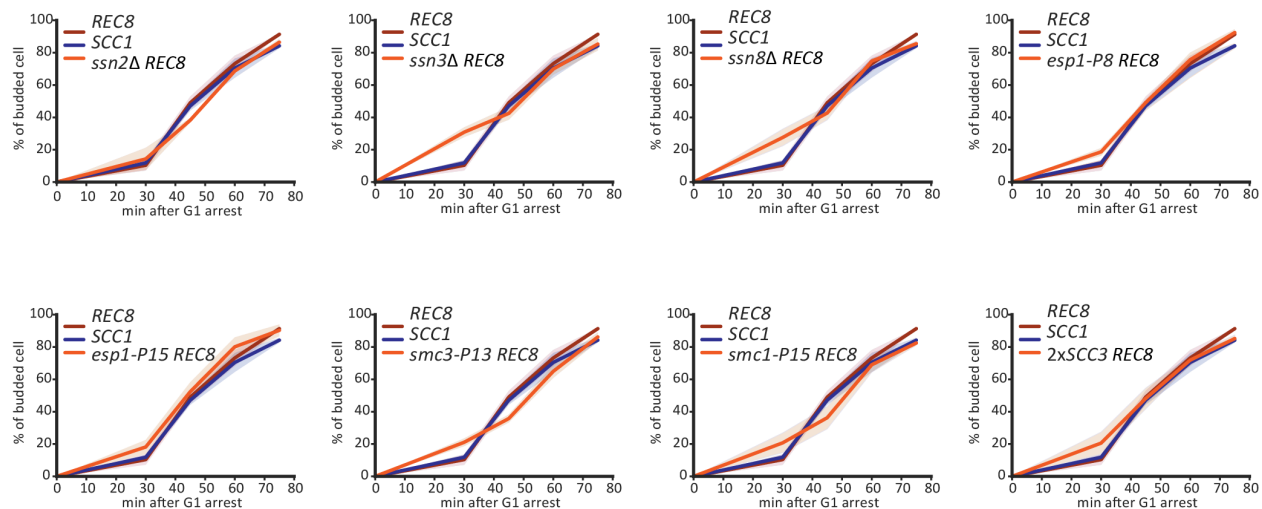

1213  
1214 **Figure S12. Individual reconstructed mutations don't delay the onset of cell cycle in Rec8-**  
1215 **expressing cells.**

1216 Cells were arrested in G1 and then released as described in Fig. 6A. The y-axis shows the fraction  
1217 of budded cells in a population, measured as the budding index. Strains carrying single  
1218 reconstructed mutation (*ssn2Δ*, *ssn3Δ*, *ssn8Δ*, *esp1-P8*, *esp1-P15*, *smc3-P13*, *smc1-P15*, and two  
1219 copies of *SCC3*) are compared with wild type and the Rec8-expressing strain. The mean (solid  
1220 line) and standard deviation (shaded region) of three biological replicates for each strain are shown.

1221  
1222  
1223

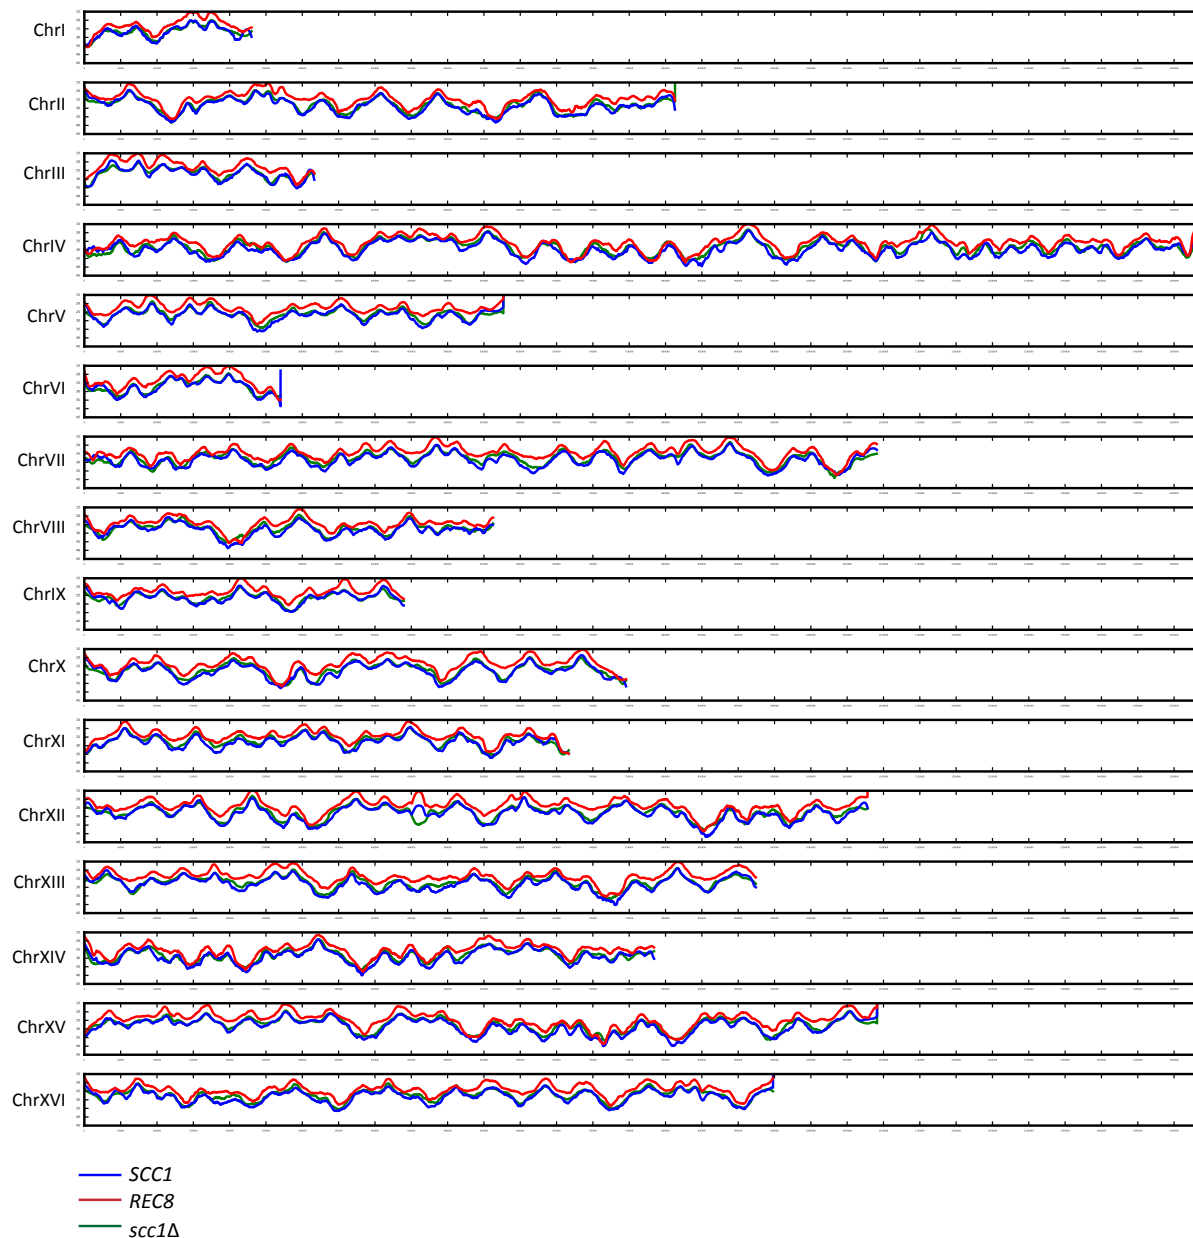

1224  
1225  
1226  
1227  
1228  
1229  
1230  
1231  
1232  
1233

**Figure S13. The whole genome replication profiles of wild type, the Rec8-expressing strain, and the *scc1Δ* strain**

The mean replication profile of two experiments is shown. The replication profile of each strain is color-coded (*SCC1* in blue, *REC8* in red, and *scc1Δ* in green) and arranged by the order of chromosome. The y-axis represents  $T_{rep}$ , the time at which 50% of cells in a population completes replication at a given genomic locus (See Materials and Methods for detailed analysis).

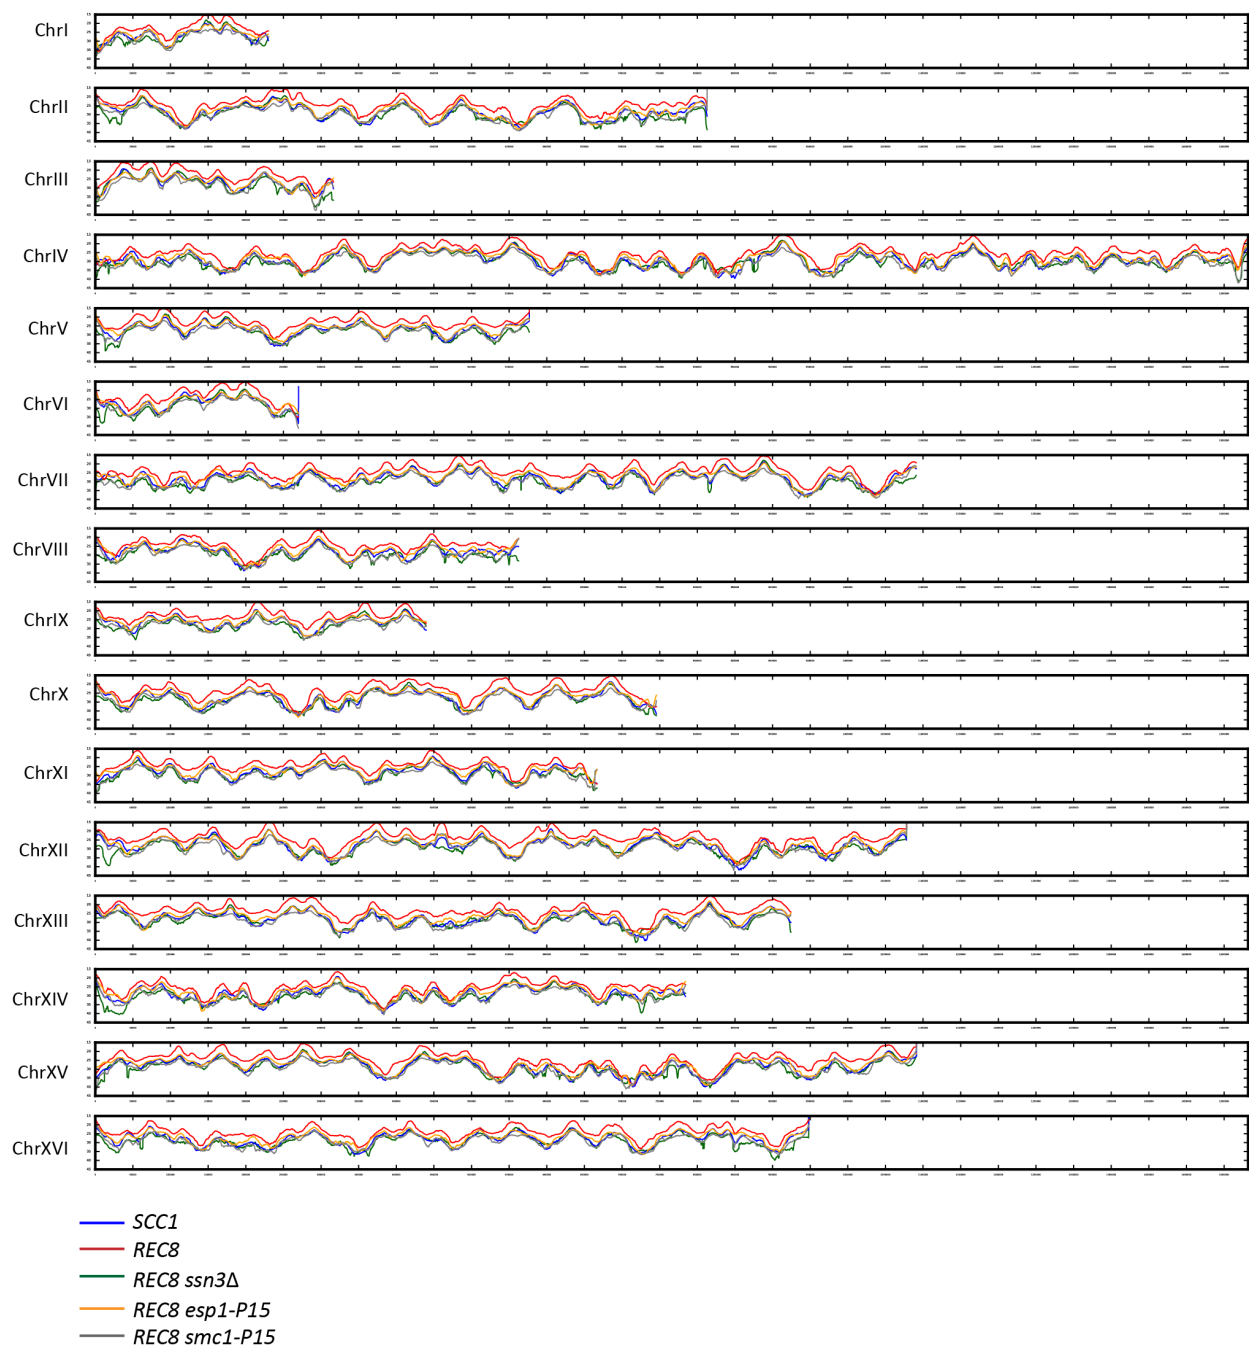

1234  
1235  
1236  
1237  
1238  
1239  
1240  
1241  
1242  
1243

**Figure S14. The whole genome replication profiles of the *Rec8*-expressing strain and reconstructed strains carrying a single evolved mutation, *ssn3* $\Delta$ , *esp1-P15*, or *smc1-P15***  
These replication profiles are the data shown in Fig. 6E. The mean replication profile from two experiments is color-coded by strain and arranged by order of chromosome. The y-axis represents  $T_{rep}$ , the time at which 50% of cells in a population completes replication at a given genomic locus (See Materials and Methods for detailed analysis).

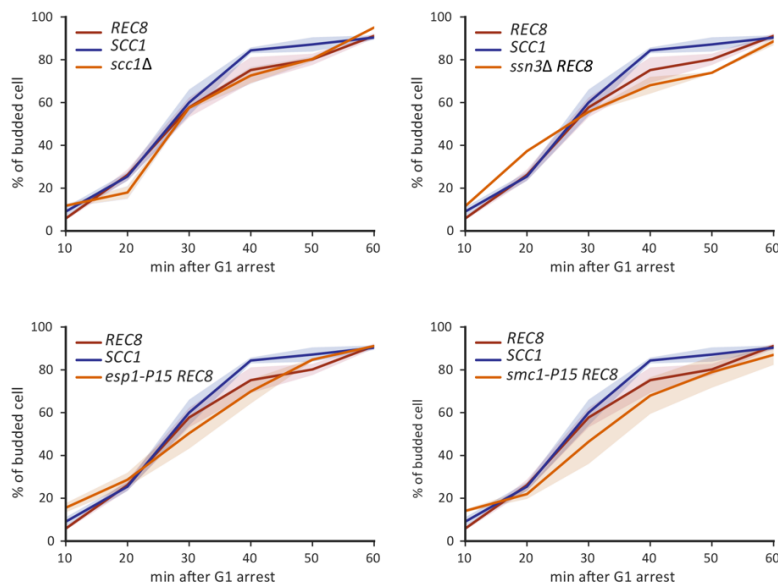

1244  
1245 **Figure S15. The budding index of yeast strains that are processed for replication profiling**  
1246 Cells were arrested in G1 and then released as described in Fig. 6E, S13, and S14. The y-axis  
1247 shows the fraction of budded cells in a population, measured as budding index. The mean (solid  
1248 line) and standard deviation (shaded region) of two biological replicates for each strain are shown.  
1249

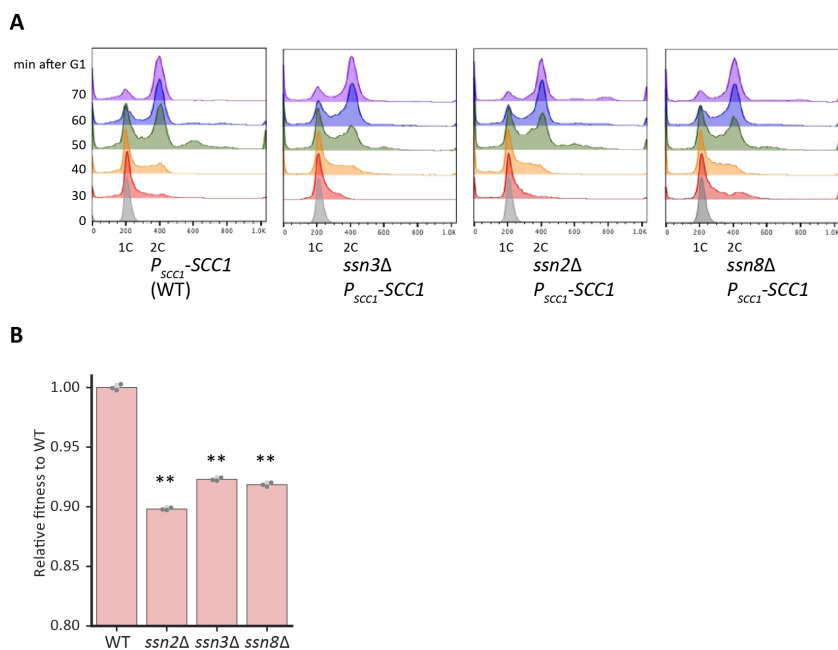

1250  
1251 **Figure S16. Deletion of genes encoding the Cdk8 complex slightly slows genome replication**  
1252 **and cause 8-11% cost in wild type.**  
1253 **(A)** The cell cycle progression profiles of *ssn2Δ*, *ssn3Δ*, or *ssn8Δ* strains compared to a wild type  
1254 control after release from a G1 arrest. **(B)** The fitness of *ssn2Δ*, *ssn3Δ*, or *ssn8Δ* strains relative to  
1255 wild type, measured by competitive fitness assay. The darker gray points represent the values of  
1256 three biological replicates and the thinner gray bar represents one standard deviation on each side  
1257 of the mean of these measurements. The statistical significance between data from wild type and  
1258 each mutant strain was calculated by two-tailed Student *t* test, \*\*  $p < 0.01$ .

1259  
1260

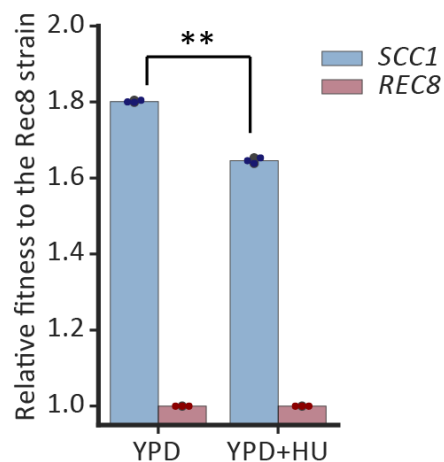

1261  
1262 **Figure S17. Hydroxyurea decreases the fitness difference between the *Rec8*-expressing strain**  
1263 **and wild type**

1264 The fitness of wild type strains relative to the *Rec8*-expressing strain were measured in YPD and  
1265 YPD containing 12.5mM hydroxyurea (HU). The colored points represent the values of three  
1266 biological replicates and the darker gray bar represents one standard deviation on each side of the  
1267 mean of these measurements. (two-tailed Student *t* test, \*\*  $p < 0.01$ )

1268  
1269

## 1270 Acknowledgements

1271  
1272 We thank Dana Branzei for providing yeast strain, Nichole Wespe and Marco Fumasoni for help  
1273 with analysis of whole genome sequencing data, and Bauer Core Facility at Harvard for help with  
1274 experiments. We thank Angelika Amon, Steve Bell, Jun-Yi Leu, Thomas LaBar, Andrea Giometto,  
1275 Marco Fumasoni, and Hung-Ji Tsai for critical feedback on the manuscript. We thank members of  
1276 the Murray lab and Marston lab for useful discussion. This work was supported by the following  
1277 grants: Wellcome Senior Fellowship 107827, Wellcome Centre core grant 203149, and NIH RO1-  
1278 GM43987 and the NSF-Simons Center for the Mathematical and Statistical Analysis of Biology  
1279 (#1764269 (NSF) & #594596 (Simons)).

1280  
1281

## 1282 Author contributions

1283  
1284 YPH, conception and design, acquisition of data, analysis and interpretation of data, drafting and  
1285 revising the manuscript. VM, acquisition of ChIP-Seq, manuscript discussion and revision. DR,  
1286 analysis of ChIP-Seq. ALM, manuscript discussion and revision. AWM, conception and design,  
1287 interpretation of data, drafting and revising the manuscript.

1288  
1289  
1290

## 1291 Reference

- 1292
- 1293 Aakre, C.D., Herrou, J., Phung, T.N., Perchuk, B.S., Crosson, S., and Laub, M.T. (2015).
- 1294 Evolving new protein-protein interaction specificity through promiscuous intermediates. *Cell*
- 1295 *163*, 594-606.
- 1296 Allen, B.L., and Taatjes, D.J. (2015). The Mediator complex: a central integrator of transcription.
- 1297 *Nat Rev Mol Cell Biol* *16*, 155-166.
- 1298 Amoutzias, G.D., He, Y., Gordon, J., Mossialos, D., Oliver, S.G., and Van de Peer, Y. (2010).
- 1299 Posttranslational regulation impacts the fate of duplicated genes. *Proc Natl Acad Sci U S A* *107*,
- 1300 2967-2971.
- 1301 Aparicio, O.M. (2013). Location, location, location: it's all in the timing for replication origins.
- 1302 *Genes Dev* *27*, 117-128.
- 1303 Azvolinsky, A., Dunaway, S., Torres, J.Z., Bessler, J.B., and Zakian, V.A. (2006). The S.
- 1304 cerevisiae Rrm3p DNA helicase moves with the replication fork and affects replication of all
- 1305 yeast chromosomes. *Genes Dev* *20*, 3104-3116.
- 1306 Banyai, G., Szilagyi, Z., Baraznenok, V., Khorosjutina, O., and Gustafsson, C.M. (2017). Cyclin
- 1307 C influences the timing of mitosis in fission yeast. *Mol Biol Cell* *28*, 1738-1744.
- 1308 Baym, M., Kryazhimskiy, S., Lieberman, T.D., Chung, H., Desai, M.M., and Kishony, R.
- 1309 (2015). Inexpensive multiplexed library preparation for megabase-sized genomes. *PLoS One* *10*,
- 1310 e0128036.
- 1311 Bell, S.P., and Labib, K. (2016). Chromosome Duplication in *Saccharomyces cerevisiae*.
- 1312 *Genetics* *203*, 1027-1067.
- 1313 Bershtein, S., Serohijos, A.W., Bhattacharyya, S., Manhart, M., Choi, J.M., Mu, W., Zhou, J.,
- 1314 and Shakhnovich, E.I. (2015). Protein Homeostasis Imposes a Barrier on Functional Integration
- 1315 of Horizontally Transferred Genes in Bacteria. *PLoS Genet* *11*, e1005612.
- 1316 Boos, D., and Ferreira, P. (2019). Origin Firing Regulations to Control Genome Replication
- 1317 Timing. *Genes (Basel)* *10*.
- 1318 Brar, G.A., Hochwagen, A., Ee, L.S., and Amon, A. (2009). The multiple roles of cohesin in
- 1319 meiotic chromosome morphogenesis and pairing. *Mol Biol Cell* *20*, 1030-1047.
- 1320 Buonomo, S.B., Clyne, R.K., Fuchs, J., Loidl, J., Uhlmann, F., and Nasmyth, K. (2000).
- 1321 Disjunction of homologous chromosomes in meiosis I depends on proteolytic cleavage of the
- 1322 meiotic cohesin Rec8 by separin. *Cell* *103*, 387-398.
- 1323 Cha, R.S.W., B.M.; Keeney, S.; Dekker, J.; Kleckner, N. (2000). Progression of meiotic DNA
- 1324 replication is modulated by interchromosomal interaction proteins, negatively by Spo11p and
- 1325 positively by Rec8p. *Genes Dev* *14*, 493.
- 1326 Chothia, C., Gough, J., Vogel, C., and Teichmann, S.A. (2003). Evolution of the protein
- 1327 repertoire. *Science* *300*, 1701-1703.
- 1328 Cobbe, N., and Heck, M.M. (2004). The evolution of SMC proteins: phylogenetic analysis and
- 1329 structural implications. *Mol Biol Evol* *21*, 332-347.
- 1330 Costanzo, M., VanderSluis, B., Koch, E.N., Baryshnikova, A., Pons, C., Tan, G., Wang, W.,
- 1331 Usaj, M., Hanchard, J., Lee, S.D., *et al.* (2016). A global genetic interaction network maps a
- 1332 wiring diagram of cellular function. *Science* *353*.
- 1333 Desai, M.M., Fisher, D.S., and Murray, A.W. (2007). The speed of evolution and maintenance of
- 1334 variation in asexual populations. *Curr Biol* *17*, 385-394.

- 1335 Donaldson, A.D., Raghuraman, M.K., Friedman, K.L., Cross, F.R., Brewer, B.J., and Fangman,  
1336 W.L. (1998). CLB5-Dependent Activation of Late Replication Origins in *S. cerevisiae*.  
1337 *Molecular Cell* 2, 173-182.
- 1338 Donze, D., Adams, C.R., Rine, J., and Kamakaka, R.T. (1999). The boundaries of the silenced  
1339 HMR domain in *Saccharomyces cerevisiae*. *Genes Dev* 13, 698-708.
- 1340 Dorsett, D., and Merckenschlager, M. (2013). Cohesin at active genes: a unifying theme for  
1341 cohesin and gene expression from model organisms to humans. *Curr Opin Cell Biol* 25, 327-333.
- 1342 Feeney, K.M., Wasson, C.W., and Parish, J.L. (2010). Cohesin: a regulator of genome integrity  
1343 and gene expression. *Biochem J* 428, 147-161.
- 1344 Fernius, J., and Marston, A.L. (2009). Establishment of cohesion at the pericentromere by the  
1345 Ctf19 kinetochore subcomplex and the replication fork-associated factor, Csm3. *PLoS Genet* 5,  
1346 e1000629.
- 1347 Fernius, J., Nerusheva, O.O., Galander, S., Alves Fde, L., Rappsilber, J., and Marston, A.L.  
1348 (2013). Cohesin-dependent association of *scc2/4* with the centromere initiates pericentromeric  
1349 cohesion establishment. *Curr Biol* 23, 599-606.
- 1350 Flick, J.S., and Johnston, M. (1990). Two systems of glucose repression of the GAL1 promoter  
1351 in *Saccharomyces cerevisiae*. *Mol Cell Biol* 10, 4757-4769.
- 1352 Fumasoni, M., and Murray, A.W. (2019). The evolutionary plasticity of chromosome  
1353 metabolism allows adaptation to DNA replication stress. bioRxiv preprint.
- 1354 Gagnon-Arsenault, I., Marois Blanchet, F.C., Rochette, S., Diss, G., Dube, A.K., and Landry,  
1355 C.R. (2013). Transcriptional divergence plays a role in the rewiring of protein interaction  
1356 networks after gene duplication. *J Proteomics* 81, 112-125.
- 1357 Gay, S., Piccini, D., Bruhn, C., Ricciardi, S., Soffientini, P., Carotenuto, W., Biffo, S., and  
1358 Foiani, M. (2018). A Mad2-Mediated Translational Regulatory Mechanism Promoting S-Phase  
1359 Cyclin Synthesis Controls Origin Firing and Survival to Replication Stress. *Mol Cell* 70, 628-  
1360 638 e625.
- 1361 Gerstein, A.C., Chun, H.J., Grant, A., and Otto, S.P. (2006). Genomic convergence toward  
1362 diploidy in *Saccharomyces cerevisiae*. *PLoS Genet* 2, e145.
- 1363 Guacci, V., Koshland, D., and Strunnikov, A. (1997). A direct link between sister chromatid  
1364 cohesion and chromosome condensation revealed through the analysis of MCD1 in *S. cerevisiae*.  
1365 *Cell* 91, 47-57.
- 1366 Heidinger-Pauli, J.M., Unal, E., Guacci, V., and Koshland, D. (2008). The kleisin subunit of  
1367 cohesin dictates damage-induced cohesion. *Mol Cell* 31, 47-56.
- 1368 Hinshaw, S.M., Makrantoni, V., Harrison, S.C., and Marston, A.L. (2017). The Kinetochore  
1369 Receptor for the Cohesin Loading Complex. *Cell* 171, 72-84 e13.
- 1370 Hinshaw, S.M., Makrantoni, V., Kerr, A., Marston, A.L., and Harrison, S.C. (2015). Structural  
1371 evidence for *Scs4*-dependent localization of cohesin loading. *Elife* 4, e06057.
- 1372 Hirano, T. (2012). Condensins: universal organizers of chromosomes with diverse functions.  
1373 *Genes Dev* 26, 1659-1678.
- 1374 Hittinger, C.T., and Carroll, S.B. (2007). Gene duplication and the adaptive evolution of a classic  
1375 genetic switch. *Nature* 449, 677-681.
- 1376 Ho, K.L., Ma, L., Cheung, S., Manhas, S., Fang, N., Wang, K., Young, B., Loewen, C., Mayor,  
1377 T., and Measday, V. (2015). A role for the budding yeast separase, *Esp1*, in *Ty1* element  
1378 retrotransposition. *PLoS Genet* 11, e1005109.
- 1379 Hottes, A.K., Freddolino, P.L., Khare, A., Donnell, Z.N., Liu, J.C., and Tavazoie, S. (2013).  
1380 Bacterial adaptation through loss of function. *PLoS Genet* 9, e1003617.



1381 Hu, B., Itoh, T., Mishra, A., Katoh, Y., Chan, K.L., Upcher, W., Godlee, C., Roig, M.B.,  
1382 Shirahige, K., and Nasmyth, K. (2011). ATP hydrolysis is required for relocating cohesin from  
1383 sites occupied by its Scc2/4 loading complex. *Curr Biol* 21, 12-24.  
1384 Jerison, E.R., Kryazhimskiy, S., Mitchell, J.K., Bloom, J.S., Kruglyak, L., and Desai, M.M.  
1385 (2017). Genetic variation in adaptability and pleiotropy in budding yeast. *Elife* 6.  
1386 Johnston, M., Flick, J.S., and Pexton, T. (1994). Multiple mechanisms provide rapid and  
1387 stringent glucose repression of GAL gene expression in *Saccharomyces cerevisiae*. *Mol Cell*  
1388 *Biol* 14, 3834-3841.  
1389 Klein, F., Mahr, P., Galova, M., Buonomo, S.B., Michaelis, C., Nairz, K., and Nasmyth, K.  
1390 (1999). A central role for cohesins in sister chromatid cohesion, formation of axial elements, and  
1391 recombination during yeast meiosis. *Cell* 98, 91-103.  
1392 Kohler, K., Sanchez-Pulido, L., Hofer, V., Marko, A., Ponting, C.P., Snijders, A.P., Feederle, R.,  
1393 Schepers, A., and Boos, D. (2019). The Cdk8/19-cyclin C transcription regulator functions in  
1394 genome replication through metazoan Sld7. *PLoS Biol* 17, e2006767.  
1395 Koschwanez, J.H., Foster, K.R., and Murray, A.W. (2013). Improved use of a public good  
1396 selects for the evolution of undifferentiated multicellularity. *Elife* 2, e00367.  
1397 Kryazhimskiy, S., Rice, D.P., Jerison, E.R., and Desai, M.M. (2014). Microbial evolution.  
1398 Global epistasis makes adaptation predictable despite sequence-level stochasticity. *Science* 344,  
1399 1519-1522.  
1400 Kushnirov, V.V. (2000). Rapid and reliable protein extraction from yeast. *Yeast* 16, 857-860.  
1401 Laan, L., Koschwanez, J.H., and Murray, A.W. (2015). Evolutionary adaptation after crippling  
1402 cell polarization follows reproducible trajectories. *Elife* 4.  
1403 Lang, G.I., Rice, D.P., Hickman, M.J., Sodergren, E., Weinstock, G.M., Botstein, D., and Desai,  
1404 M.M. (2013). Pervasive genetic hitchhiking and clonal interference in forty evolving yeast  
1405 populations. *Nature* 500, 571-574.  
1406 Lazar-Stefanita, L., Scolari, V.F., Mercy, G., Muller, H., Guerin, T.M., Thierry, A.,  
1407 Mozziconacci, J., and Koszul, R. (2017). Cohesins and condensins orchestrate the 4D dynamics  
1408 of yeast chromosomes during the cell cycle. *EMBO J* 36, 2684-2697.  
1409 Lengronne, A., Katou, Y., Mori, S., Yokobayashi, S., Kelly, G.P., Itoh, T., Watanabe, Y.,  
1410 Shirahige, K., and Uhlmann, F. (2004). Cohesin relocation from sites of chromosomal loading to  
1411 places of convergent transcription. *Nature* 430, 573-578.  
1412 Li, R., and Murray, A.W. (1991). Feedback control of mitosis in budding yeast. *Cell* 66, 519-  
1413 531.  
1414 Li, Y., Muir, K.W., Bowler, M.W., Metz, J., Haering, C.H., and Panne, D. (2018). Structural  
1415 basis for Scc3-dependent cohesin recruitment to chromatin. *Elife* 7.  
1416 Lundblad, V., and Zhou, H. (2001). Manipulation of plasmids from yeast cells. *Curr Protoc Mol*  
1417 *Biol Chapter* 13, Unit13 19.  
1418 Makrantonis, V., Robertson, D., and Marston, A.L. (2019). Analysis of the Chromosomal  
1419 Localization of Yeast SMC Complexes by Chromatin Immunoprecipitation. *Methods Mol Biol*  
1420 2004, 119-138.  
1421 Mangado, A., Morales, P., Gonzalez, R., and Tronchoni, J. (2018). Evolution of a Yeast With  
1422 Industrial Background Under Winemaking Conditions Leads to Diploidization and  
1423 Chromosomal Copy Number Variation. *Front Microbiol* 9, 1816.  
1424 Mantiero, D., Mackenzie, A., Donaldson, A., and Zegerman, P. (2011). Limiting replication  
1425 initiation factors execute the temporal programme of origin firing in budding yeast. *EMBO J* 30,  
1426 4805-4814.

- 1427 Marston, A.L. (2014). Chromosome segregation in budding yeast: sister chromatid cohesion and  
1428 related mechanisms. *Genetics* *196*, 31-63.
- 1429 Mehta, G.D., Rizvi, S.M., and Ghosh, S.K. (2012). Cohesin: a guardian of genome integrity.  
1430 *Biochim Biophys Acta* *1823*, 1324-1342.
- 1431 Melby, T.E., Ciampaglio, C.N., Briscoe, G., and Erickson, H.P. (1998). The symmetrical  
1432 structure of structural maintenance of chromosomes (SMC) and MukB proteins: long,  
1433 antiparallel coiled coils, folded at a flexible hinge. *J Cell Biol* *142*, 1595-1604.
- 1434 Michaelis, C., Ciosk, R., and Nasmyth, K. (1997). Cohesins: Chromosomal Proteins that Prevent  
1435 Premature Separation of Sister Chromatids. *Cell* *91*, 35-45.
- 1436 Morgenthaler, A.B., Kinney, W.R., Ebmeier, C.C., Walsh, C.M., Snyder, D.J., Cooper, V.S.,  
1437 Old, W.M., and Copley, S.D. (2019). Mutations that improve the efficiency of a weak-link  
1438 enzyme are rare compared to adaptive mutations elsewhere in the genome. *bioRxiv preprint*.
- 1439 Nasmyth, K. (2002). Segregating sister genomes: the molecular biology of chromosome  
1440 separation. *Science* *297*, 559-565.
- 1441 Nemet, J., Jelacic, B., Rubelj, I., and Sopta, M. (2014). The two faces of Cdk8, a  
1442 positive/negative regulator of transcription. *Biochimie* *97*, 22-27.
- 1443 Nguyen Ba, A.N., Strome, B., Hua, J.J., Desmond, J., Gagnon-Arsenault, I., Weiss, E.L., Landry,  
1444 C.R., and Moses, A.M. (2014). Detecting functional divergence after gene duplication through  
1445 evolutionary changes in posttranslational regulatory sequences. *PLoS Comput Biol* *10*,  
1446 e1003977.
- 1447 Orengo, C.A., and Thornton, J.M. (2005). Protein families and their evolution-a structural  
1448 perspective. *Annu Rev Biochem* *74*, 867-900.
- 1449 Orgil, O., Matityahu, A., Eng, T., Guacci, V., Koshland, D., and Onn, I. (2015). A conserved  
1450 domain in the scc3 subunit of cohesin mediates the interaction with both mcd1 and the cohesin  
1451 loader complex. *PLoS Genet* *11*, e1005036.
- 1452 Paldi, F., Alver, B., Robertson, D., Schalbetter, S.A., Kerr, A., Kelly, D.A., Neale, M.J., Baxter,  
1453 J., and Marston, A.L. (2019). Convergent genes shapes budding yeast pericentromeres. *bioRxiv*  
1454 *preprint*.
- 1455 Peric-Hupkes, D., and van Steensel, B. (2008). Linking cohesin to gene regulation. *Cell* *132*,  
1456 925-928.
- 1457 Rancati, G., Pavelka, N., Fleharty, B., Noll, A., Trimble, R., Walton, K., Perera, A., Staehling-  
1458 Hampton, K., Seidel, C.W., and Li, R. (2008). Aneuploidy underlies rapid adaptive evolution of  
1459 yeast cells deprived of a conserved cytokinesis motor. *Cell* *135*, 879-893.
- 1460 Roig, M.B., Löwe, J., Chan, K.-L., Beckouët, F., Metson, J., and Nasmyth, K. (2014). Structure  
1461 and function of cohesin's Scc3/SA regulatory subunit. *FEBS Letters* *588*, 3692-3702.
- 1462 Rosebrock, A.P. (2017). Synchronization and Arrest of the Budding Yeast Cell Cycle Using  
1463 Chemical and Genetic Methods. *Cold Spring Harb Protoc* *2017*.
- 1464 Saayman, X., Ramos-Perez, C., and Brown, G.W. (2018). DNA Replication Profiling Using  
1465 Deep Sequencing. *Methods Mol Biol* *1672*, 195-207.
- 1466 Schalbetter, S.A., Fudenberg, G., Baxter, J., Pollard, K.S., and Neale, M.J. (2019). Principles of  
1467 meiotic chromosome assembly revealed in *S. cerevisiae*. *Nat Commun* *10*, 4795.
- 1468 Schindelin, J., Arganda-Carreras, I., Frise, E., Kaynig, V., Longair, M., Pietzsch, T., Preibisch,  
1469 S., Rueden, C., Saalfeld, S., Schmid, B., *et al.* (2012). Fiji: an open-source platform for  
1470 biological-image analysis. *Nat Methods* *9*, 676-682.
- 1471 Schleiffer, A., Kaitna, S., Maurer-Stroh, S., Glotzer, M., Nasmyth, K., and Eisenhaber, F. (2003).  
1472 Kleisins: a superfamily of bacterial and eukaryotic SMC protein partners. *Mol Cell* *11*, 571-575.

- 1473 Schwob, E., and Nasmyth, K. (1993). CLB5 and CLB6, a new pair of B cyclins involved in  
1474 DNA replication in *Saccharomyces cerevisiae*. *Genes Dev* 7, 1160-1175.
- 1475 Shah, J.V., and Cleveland, D.W. (2000). Waiting for Anaphase. *Cell* 103, 997-1000.
- 1476 Soppa, J. (2001). Prokaryotic structural maintenance of chromosomes (SMC) proteins:  
1477 distribution, phylogeny, and comparison with MukBs and additional prokaryotic and eukaryotic  
1478 coiled-coil proteins. *Gene* 278, 253-264.
- 1479 Straight, A.F., Belmont, A.S., Robinett, C.C., and Murray, A.W. (1996). GFP tagging of budding  
1480 yeast chromosomes reveals that protein-protein interactions can mediate sister chromatid  
1481 cohesion. *Current Biology* 6, 1599-1608.
- 1482 Straight, A.F., Marshall, W.F., Sedat, J.W., and Murray, A.W. (1997). Mitosis in living budding  
1483 yeast: anaphase A but no metaphase plate. *Science* 277, 574-578.
- 1484 Sunshine, A.B., Payen, C., Ong, G.T., Liachko, I., Tan, K.M., and Dunham, M.J. (2015). The  
1485 fitness consequences of aneuploidy are driven by condition-dependent gene effects. *PLoS Biol*  
1486 13, e1002155.
- 1487 Torres, E.M., Sokolsky, T., Tucker, C.M., Chan, L.Y., Boselli, M., Dunham, M.J., and Amon, A.  
1488 (2007). Effects of aneuploidy on cellular physiology and cell division in haploid yeast. *Science*  
1489 317, 916-924.
- 1490 Toth, A., Rabitsch, K.P., Galova, M., Schleiffer, A., Buonomo, S.B., and Nasmyth, K. (2000).  
1491 Functional genomics identifies monopolin: a kinetochore protein required for segregation of  
1492 homologs during meiosis i. *Cell* 103, 1155-1168.
- 1493 Uhlmann, F., Lottspeich, F., and Nasmyth, K. (1999). Sister-chromatid separation at anaphase  
1494 onset is promoted by cleavage of the cohesin subunit Scc1. *Nature* 400, 37-42.
- 1495 Uhlmann, F., and Nasmyth, K. (1998). Cohesion between sister chromatids must be established  
1496 during DNA replication. *Current Biology* 8, 1095-1102.
- 1497 Uhlmann, F., Wernic, D., Poupard, M.A., Koonin, E.V., and Nasmyth, K. (2000). Cleavage of  
1498 cohesin by the CD clan protease separin triggers anaphase in yeast. *Cell* 103, 375-386.
- 1499 Voordeckers, K., Brown, C.A., Vanneste, K., van der Zande, E., Voet, A., Maere, S., and  
1500 Verstrepen, K.J. (2012). Reconstruction of ancestral metabolic enzymes reveals molecular  
1501 mechanisms underlying evolutionary innovation through gene duplication. *PLoS Biol* 10,  
1502 e1001446.
- 1503 Voordeckers, K., Kominek, J., Das, A., Espinosa-Cantu, A., De Maeyer, D., Arslan, A., Van Pee,  
1504 M., van der Zande, E., Meert, W., Yang, Y., *et al.* (2015). Adaptation to High Ethanol Reveals  
1505 Complex Evolutionary Pathways. *PLoS Genet* 11, e1005635.
- 1506 Wildenberg, G.A., and Murray, A.W. (2014). Evolving a 24-hr oscillator in budding yeast. *Elife*  
1507 3.
- 1508 Wu, N., and Yu, H. (2012). The Smc complexes in DNA damage response. *Cell Biosci* 2, 5.
- 1509 Yona, A.H., Manor, Y.S., Herbst, R.H., Romano, G.H., Mitchell, A., Kupiec, M., Pilpel, Y., and  
1510 Dahan, O. (2012). Chromosomal duplication is a transient evolutionary solution to stress. *Proc*  
1511 *Natl Acad Sci U S A* 109, 21010-21015.
- 1512
- 1513
- 1514
- 1515
- 1516
- 1517
- 1518
